# Supplementary material for: Sperm flagellar 2 (SPEF2) is essential for sperm flagellar assembly in humans
Source: PubMed Central journal article supplement — Asian J Androl. 2021 Nov 5;24(4):359–66. doi: 10.4103/aja202154 (PMC9295471; doi:10.4103/aja202154), 2021-11-05
Supplement: AJA-24-359_Suppl1.pdf [file AJA-24-359_Suppl1.pdf]

**Supplementary Table 2. The downregulated and upregulated proteins in PCD/NC sperms**

| <b>Protein accession</b> | <b>PCD/NC Ratio</b> | <b>Regulated Type</b> | <b>PCD/NC P value</b> | <b>Gene name</b> | <b>MW [kDa]</b> | <b>Score</b> | <b>Coverage [%]</b> |
|--------------------------|---------------------|-----------------------|-----------------------|------------------|-----------------|--------------|---------------------|
| O96007                   | 4.598               | Up                    | 0.035879              | MOCS2            | 20.944          | 7.9502       | 8                   |
| O95473                   | 4.004               | Up                    | 0.0075602             | SYNGR4           | 25.82           | 92.623       | 9.4                 |
| P49914                   | 3.881               | Up                    | 0.0058961             | MTHFS            | 23.255          | 18.3         | 24.6                |
| O95352                   | 3.325               | Up                    | 0.00156415            | ATG7             | 77.959          | 11.102       | 7.5                 |
| P68871                   | 3.307               | Up                    | 0.000097249           | HBB              | 15.998          | 99.228       | 61.2                |
| Q9H0N0                   | 3.18                | Up                    | 0.000178678           | RAB6C            | 28.355          | 65.651       | 12.2                |
| Q9Y5E2                   | 3.146               | Up                    | 0.00038351            | PCDHB7           | 86.706          | 1.9804       | 1.4                 |
| P04264                   | 3.089               | Up                    | 1.69E-05              | KRT1             | 66.038          | 323.31       | 45.5                |
| P02042                   | 3.061               | Up                    | 0.000023214           | HBD              | 16.055          | 46.705       | 50.3                |
| Q9UKA8                   | 3.059               | Up                    | 0.00125871            | RCAN3            | 27.491          | 22.953       | 24.5                |
| Q9UBI6                   | 2.986               | Up                    | 1.90E-06              | GNG12            | 8.0061          | 25.034       | 76.4                |
| Q8NEP9                   | 2.843               | Up                    | 0.0076404             | ZNF555           | 73.084          | -2           | 1.4                 |
| Q7Z7B7                   | 2.676               | Up                    | 0.000044594           | DEFB132          | 10.61           | 2.8519       | 10.5                |
| Q9P2E3                   | 2.675               | Up                    | 0.000078625           | ZNFX1            | 220.22          | -2           | 0.5                 |
| Q02224                   | 2.567               | Up                    | 0.00199611            | CENPE            | 316.41          | 2.6568       | 0.6                 |
| Q14012                   | 2.557               | Up                    | 1.71E-05              | CAMK1            | 41.337          | 141.54       | 33                  |
| Q9NQS7                   | 2.55                | Up                    | 0.0181424             | INCENP           | 105.43          | 3.7385       | 1.3                 |
| O43150                   | 2.515               | Up                    | 0.00074057            | ASAP2            | 111.65          | 2.1667       | 1.4                 |
| Q9ULC3                   | 2.479               | Up                    | 0.00040092            | RAB23            | 26.659          | 65.002       | 25.3                |
| O94885                   | 2.476               | Up                    | 0.00067541            | SASH1            | 136.65          | 1.8742       | 0.8                 |
| P08473                   | 2.468               | Up                    | 1.33E-06              | MME              | 85.513          | 323.31       | 38.9                |
| Q6UW15                   | 2.466               | Up                    | 1.58E-05              | REG3G            | 19.33           | 20.754       | 31.4                |
| P20336                   | 2.463               | Up                    | 0.000118259           | RAB3A            | 24.984          | 61.303       | 15.9                |
| Q86VY4                   | 2.42                | Up                    | 0.00024373            | TSPYL5           | 45.143          | 45.208       | 8.4                 |
| P34913                   | 2.347               | Up                    | 0.000138599           | EPHX2            | 62.615          | 185.49       | 35.5                |
| Q9NWW6                   | 2.271               | Up                    | 0.00022096            | NMRK1            | 23.193          | 3.5277       | 6.5                 |
| P30041                   | 2.254               | Up                    | 4.82E-07              | PRDX6            | 25.035          | 323.31       | 58.9                |
| P62834                   | 2.244               | Up                    | 4.38E-06              | RAP1A            | 20.987          | 60.554       | 47.3                |
| Q8TDR0                   | 2.195               | Up                    | 0.00084391            | TRAF3IP1         | 78.631          | 11.169       | 6.8                 |
| P31151                   | 2.179               | Up                    | 1.53E-06              | S100A7           | 11.471          | 12.077       | 23.8                |
| P54107                   | 2.166               | Up                    | 0.000063204           | CRISP1           | 28.481          | 308.57       | 36.5                |
| P06730                   | 2.164               | Up                    | 0.00054454            | EIF4E            | 25.097          | 18.055       | 15.2                |
| P52788                   | 2.157               | Up                    | 0.00035991            | SMS              | 41.268          | 72.89        | 31.7                |
| Q9H0W9                   | 2.071               | Up                    | 1.19E-06              | C11orf54         | 35.117          | 73.79        | 29.2                |
| Q8NG35                   | 2.07                | Up                    | 0.0060038             | DEFB105A         | 8.9225          | 3.2151       | 17.9                |
| Q53EL6                   | 2.069               | Up                    | 0.000140497           | PDCD4            | 51.735          | 37.399       | 11.3                |
| Q14508                   | 2.046               | Up                    | 0.035404              | WFDC2            | 12.993          | 16.276       | 21.8                |
| Q6IAN0                   | 2.038               | Up                    | 0.000040364           | DHRS7B           | 35.119          | 20.372       | 12.6                |
| Q9UBS8                   | 2.036               | Up                    | 4.94E-06              | RNF14            | 53.837          | 6.3123       | 9.3                 |
| B1AK53                   | 2.029               | Up                    | 0.00162237            | ESPN             | 91.732          | 62.291       | 11                  |
| Q9BRA2                   | 2.026               | Up                    | 1.73E-06              | TXNDC17          | 13.941          | 97.36        | 30.1                |
| P84085                   | 2.016               | Up                    | 0.00003504            | ARF5             | 20.529          | 7.718        | 25.6                |
| Q9UJC5                   | 1.999               | Up                    | 0.0002429             | SH3BGRL2         | 12.326          | 8.3103       | 11.2                |

|        |       |    |             |         |        |        |      |
|--------|-------|----|-------------|---------|--------|--------|------|
| P49223 | 1.982 | Up | 1.53E-05    | SPINT3  | 10.252 | 34.157 | 29.2 |
| Q9NRX4 | 1.978 | Up | 0.000022638 | PHPT1   | 13.832 | 45.606 | 34.4 |
| Q9UN36 | 1.967 | Up | 0.000057684 | NDRG2   | 40.798 | 11.757 | 9.2  |
| Q9H477 | 1.953 | Up | 0.0080773   | RBKS    | 34.143 | 2.0916 | 3.1  |
| Q687X5 | 1.952 | Up | 0.00012327  | STEAP4  | 51.981 | 117.96 | 27.2 |
| P78356 | 1.952 | Up | 0.000036779 | PIP4K2B | 47.377 | 22.559 | 17.3 |
| P28161 | 1.948 | Up | 0.000081383 | GSTM2   | 25.744 | 16.959 | 45   |
| P02751 | 1.947 | Up | 1.58E-05    | FN1     | 262.62 | 323.31 | 42.6 |
| P21964 | 1.935 | Up | 0.000080428 | COMT    | 30.037 | 82.715 | 37.3 |
| Q7L5Y1 | 1.933 | Up | 1.63E-07    | ENOSF1  | 49.786 | 78.575 | 36.3 |
| P19801 | 1.929 | Up | 0.000082145 | AOC1    | 85.377 | 74.553 | 20   |
| P04424 | 1.927 | Up | 0.000102437 | ASL     | 51.657 | 34.903 | 20   |
| P53992 | 1.905 | Up | 1.92E-05    | SEC24C  | 118.32 | 35.973 | 8.1  |
| Q7LG56 | 1.894 | Up | 0.000035905 | RRM2B   | 40.736 | 6.9679 | 8.5  |
| Q9BR76 | 1.889 | Up | 0.000137404 | CORO1B  | 54.234 | 71.177 | 29.9 |
| Q9NVJ2 | 1.88  | Up | 0.00056006  | ARL8B   | 21.539 | 42.6   | 24.2 |
| P63096 | 1.873 | Up | 0.00042333  | GNAI1   | 40.361 | 2.7863 | 21.2 |
| Q7Z6K5 | 1.869 | Up | 3.00E-06    | ARPIN   | 24.943 | 23.196 | 17.7 |
| P63241 | 1.868 | Up | 0.000061267 | EIF5A   | 16.832 | 36.063 | 39   |
| Q9BUP0 | 1.865 | Up | 0.0000846   | EFHD1   | 26.927 | 5.8788 | 17.6 |
| P16455 | 1.86  | Up | 0.0105386   | MGMT    | 21.646 | 2.2634 | 6.3  |
| Q96QF0 | 1.853 | Up | 0.002317    | RAB3IP  | 53.021 | 4.4061 | 4.2  |
| Q9UHY7 | 1.85  | Up | 0.000082557 | ENOPH1  | 28.932 | 80.239 | 30.3 |
| P35222 | 1.844 | Up | 0.0002441   | CTNNB1  | 85.496 | 59.2   | 12.4 |
| Q9NUU7 | 1.843 | Up | 0.0119185   | DDX19A  | 53.974 | 12.617 | 27.8 |
| A6NIH7 | 1.842 | Up | 0.0013958   | UNC119B | 28.136 | 20.379 | 15.9 |
| P49407 | 1.841 | Up | 0.000040264 | ARRB1   | 47.065 | 19.136 | 14.4 |
| Q01415 | 1.839 | Up | 9.44E-07    | GALK2   | 50.378 | 9.9737 | 7    |
| P80723 | 1.832 | Up | 2.35E-07    | BASP1   | 22.693 | 323.31 | 87.2 |
| P12036 | 1.824 | Up | 0.00003548  | NEFH    | 112.48 | 137.09 | 23.1 |
| O75828 | 1.822 | Up | 6.24E-07    | CBR3    | 30.85  | 4.4121 | 23.8 |
| Q9P287 | 1.818 | Up | 0.000175391 | BCCIP   | 35.979 | 2.2005 | 5.1  |
| Q9BWD1 | 1.814 | Up | 9.88E-07    | ACAT2   | 41.35  | 141.42 | 22.4 |
| P27348 | 1.81  | Up | 0.000043661 | YWHAQ   | 27.764 | 140.03 | 46.1 |
| Q86X27 | 1.805 | Up | 0.006698    | RALGPS2 | 65.166 | 23.125 | 13.4 |
| Q13938 | 1.803 | Up | 0.000022871 | CAPS    | 20.967 | 33.198 | 30.2 |
| Q8NEZ3 | 1.802 | Up | 0.0000421   | WDR19   | 151.58 | 48.213 | 9.5  |
| P61077 | 1.8   | Up | 0.000064485 | UBE2D3  | 16.687 | 5.7221 | 12.2 |
| P11766 | 1.796 | Up | 7.20E-07    | ADH5    | 39.724 | 196.29 | 39   |
| Q5TFE4 | 1.795 | Up | 0.000060568 | NT5DC1  | 51.844 | 17.635 | 7.7  |
| P62495 | 1.793 | Up | 0.000024282 | ETF1    | 49.03  | 20.191 | 14.2 |
| Q05639 | 1.791 | Up | 0.00036384  | EEF1A2  | 50.47  | 16.09  | 36.9 |
| P23526 | 1.79  | Up | 0.000044662 | AHCY    | 47.716 | 97.284 | 45.4 |
| P63098 | 1.79  | Up | 0.000039264 | PPP3R1  | 19.3   | 7.7039 | 12.9 |
| Q86TX2 | 1.785 | Up | 0.000061554 | ACOT1   | 46.277 | 19.316 | 13.8 |
| P49773 | 1.784 | Up | 0.00028426  | HINT1   | 13.802 | 62.858 | 40.5 |
| Q14019 | 1.782 | Up | 0.000039661 | COTL1   | 15.945 | 130.8  | 61.3 |

|        |       |    |             |          |        |        |      |
|--------|-------|----|-------------|----------|--------|--------|------|
| Q14232 | 1.781 | Up | 0.0034185   | EIF2B1   | 33.712 | 13.045 | 16.1 |
| P61278 | 1.772 | Up | 0.00100332  | SST      | 12.735 | 4.6079 | 9.5  |
| Q12800 | 1.771 | Up | 0.00022483  | TFCP2    | 57.255 | 34.396 | 10.2 |
| P53384 | 1.766 | Up | 0.000035951 | NUBP1    | 34.534 | 109.52 | 19.4 |
| P04792 | 1.765 | Up | 0.000064469 | HSPB1    | 22.782 | 263.96 | 56.6 |
| P43487 | 1.764 | Up | 0.000100641 | RANBP1   | 23.31  | 52.755 | 43.8 |
| P25098 | 1.764 | Up | 0.0026605   | GRK2     | 79.573 | 21.79  | 10.2 |
| P52943 | 1.761 | Up | 2.77E-06    | CRIP2    | 22.492 | 101.66 | 30.3 |
| P12081 | 1.756 | Up | 0.000035227 | HARS     | 57.41  | 31.158 | 17.9 |
| Q9UPN3 | 1.755 | Up | 2.42E-06    | MACF1    | 838.3  | 7.7101 | 0.4  |
| Q9UHR4 | 1.754 | Up | 0.000060026 | BAIAP2L1 | 56.882 | 29.285 | 11   |
| Q9Y4E6 | 1.752 | Up | 0.00051951  | WDR7     | 163.81 | 82.581 | 6.8  |
| Q6GMV3 | 1.75  | Up | 0.00008115  | PTRHD1   | 15.805 | 26.304 | 21.4 |
| Q8N8N7 | 1.749 | Up | 0.00091536  | PTGR2    | 38.499 | 66.592 | 15.7 |
| P23528 | 1.746 | Up | 1.26E-07    | CFL1     | 18.502 | 146.16 | 65.7 |
| P30086 | 1.738 | Up | 0.000037234 | PEBP1    | 21.057 | 102.98 | 62.6 |
| O14745 | 1.738 | Up | 0.00090374  | SLC9A3R1 | 38.868 | 57.74  | 32.7 |
| Q15311 | 1.738 | Up | 0.0100376   | RALBP1   | 76.063 | 10.558 | 9.6  |
| P48506 | 1.737 | Up | 0.000036762 | GCLC     | 72.765 | 169.57 | 25   |
| Q8NCW5 | 1.737 | Up | 0.0028776   | NAXE     | 31.674 | 27.119 | 28.8 |
| P29992 | 1.734 | Up | 1.19E-06    | GNA11    | 42.123 | 31.219 | 17.8 |
| O95433 | 1.733 | Up | 0.000137233 | AHSA1    | 38.274 | 176.73 | 34.3 |
| Q12774 | 1.732 | Up | 0.00053938  | ARHGEF5  | 176.8  | 5.989  | 2.3  |
| P31939 | 1.731 | Up | 0.0045245   | ATIC     | 64.615 | 151.98 | 30.1 |
| Q9BVG4 | 1.731 | Up | 0.000199674 | PBDC1    | 26.056 | 35.171 | 22.7 |
| O96033 | 1.725 | Up | 0.0029424   | MOCS2    | 9.7552 | 4.6769 | 21.6 |
| Q8NFU3 | 1.724 | Up | 2.03E-06    | TSTD1    | 12.53  | 36.511 | 40   |
| P53004 | 1.722 | Up | 0.000022404 | BLVRA    | 33.428 | 33.415 | 27.7 |
| Q8TBC4 | 1.722 | Up | 0.000143069 | UBA3     | 51.852 | 24.828 | 12.3 |
| O75874 | 1.721 | Up | 0.00020145  | IDH1     | 46.659 | 323.31 | 53.6 |
| P13796 | 1.715 | Up | 0.000024779 | LCP1     | 70.288 | 323.31 | 55.3 |
| Q14166 | 1.713 | Up | 0.000022408 | TTLL12   | 74.403 | 168    | 30.9 |
| P14550 | 1.71  | Up | 0.000036761 | AKR1A1   | 36.573 | 184.1  | 54.5 |
| P53602 | 1.71  | Up | 0.0004812   | MVD      | 43.404 | 25.159 | 18.5 |
| Q53GD3 | 1.71  | Up | 0.00024131  | SLC44A4  | 79.253 | 27.82  | 5.2  |
| P62258 | 1.706 | Up | 0.000056847 | YWHAE    | 29.174 | 298.51 | 64.7 |
| Q86SZ2 | 1.702 | Up | 0.000059149 | TRAPPC6B | 17.983 | 1.7635 | 5.1  |
| Q9UP83 | 1.7   | Up | 0.00042353  | COG5     | 92.742 | 11.274 | 7    |
| Q8TC12 | 1.697 | Up | 0.00048157  | RDH11    | 35.386 | 87.244 | 32.4 |
| O75610 | 1.694 | Up | 0.0176236   | LEFTY1   | 40.88  | 40.39  | 23   |
| Q92783 | 1.694 | Up | 0.00068358  | STAM     | 59.179 | 34.987 | 11.5 |
| P62820 | 1.689 | Up | 0.00036466  | RAB1A    | 22.677 | 256.81 | 66.8 |
| P23409 | 1.687 | Up | 0.0029757   | MYF6     | 26.952 | 1.8056 | 2.9  |
| P30043 | 1.685 | Up | 0.000083022 | BLVRB    | 22.119 | 137.94 | 45.6 |
| P32119 | 1.684 | Up | 0.000161499 | PRDX2    | 21.892 | 75.328 | 38.9 |
| O94760 | 1.683 | Up | 0.00025808  | DDAH1    | 31.121 | 95.416 | 43.5 |
| P07108 | 1.682 | Up | 0.000081816 | DBI      | 10.044 | 85.995 | 74.7 |

|         |       |    |             |          |        |        |      |
|---------|-------|----|-------------|----------|--------|--------|------|
| P31749  | 1.682 | Up | 0.00002032  | AKT1     | 55.686 | 113.77 | 25   |
| Q9NQW7  | 1.681 | Up | 1.71E-05    | XPNPEP1  | 69.917 | 171.29 | 30.2 |
| Q86X10  | 1.68  | Up | 0.00082275  | RALGAPB  | 166.8  | 24.512 | 4.9  |
| Q6VY07  | 1.678 | Up | 0.0054022   | PACS1    | 104.9  | 28.75  | 6.2  |
| P51580  | 1.677 | Up | 1.51E-05    | TPMT     | 28.18  | 11.247 | 24.9 |
| Q96C11  | 1.677 | Up | 0.003019    | FGGY     | 59.992 | 3.1646 | 3.1  |
| Q03426  | 1.676 | Up | 2.77E-06    | MVK      | 42.45  | 66.636 | 23.2 |
| P68036  | 1.675 | Up | 0.00068132  | UBE2L3   | 17.861 | 4.3114 | 11.7 |
| Q9H4A4  | 1.674 | Up | 0.002403    | RNPEP    | 72.595 | 238.06 | 36   |
| Q13451  | 1.672 | Up | 4.48E-06    | FKBP5    | 51.212 | 226.15 | 49.9 |
| Q5TZA2  | 1.671 | Up | 0.0112818   | CROCC    | 228.52 | 1.7154 | 0.4  |
| O15145  | 1.67  | Up | 0.0101244   | ARPC3    | 20.546 | 16.39  | 34.8 |
| P13693  | 1.669 | Up | 1.88E-05    | TPT1     | 19.595 | 64.848 | 40.1 |
| P49419  | 1.667 | Up | 0.00169836  | ALDH7A1  | 58.486 | 165.28 | 37.7 |
| P54578  | 1.665 | Up | 3.54E-06    | USP14    | 56.068 | 323.31 | 37.2 |
| P37802  | 1.665 | Up | 1.73E-05    | TAGLN2   | 22.391 | 69.555 | 53.3 |
| Q9Y617  | 1.665 | Up | 0.00014479  | PSAT1    | 40.422 | 97.191 | 33.2 |
| P00390  | 1.665 | Up | 0.000057561 | GSR      | 56.256 | 110.08 | 24.3 |
| Q13098  | 1.665 | Up | 0.0026201   | GPS1     | 55.536 | 90.081 | 20.8 |
| P09211  | 1.662 | Up | 1.68E-05    | GSTP1    | 23.356 | 90.753 | 46.7 |
| Q14738  | 1.662 | Up | 0.000156346 | PPP2R5D  | 69.991 | 80.283 | 23.4 |
| Q8IW41  | 1.662 | Up | 1.82E-05    | MAPKAPK5 | 54.22  | 1.6423 | 1.7  |
| Q8IWU2  | 1.662 | Up | 0.0080963   | LMTK2    | 164.9  | 1.7814 | 0.9  |
| Q9BW83  | 1.66  | Up | 0.000157666 | IFT27    | 20.48  | 44.831 | 38.2 |
| Q9HC38  | 1.658 | Up | 3.41E-06    | GLOD4    | 34.793 | 83.36  | 35.1 |
| P00558  | 1.653 | Up | 0.000042063 | PGK1     | 44.614 | 323.31 | 72.9 |
| P13797  | 1.653 | Up | 4.09E-06    | PLS3     | 70.81  | 173.9  | 35.6 |
| Q9Y5K6  | 1.653 | Up | 0.00052093  | CD2AP    | 71.45  | 32.144 | 12.8 |
| Q15185  | 1.65  | Up | 1.00E-06    | PTGES3   | 18.697 | 118.41 | 37.5 |
| Q92597  | 1.649 | Up | 0.000039809 | NDRG1    | 42.835 | 149.99 | 29.2 |
| Q14247  | 1.648 | Up | 3.29E-06    | CTTN     | 61.585 | 51.658 | 20.7 |
| O60343  | 1.646 | Up | 0.000037802 | TBC1D4   | 146.56 | 153.48 | 18.1 |
| Q06323  | 1.646 | Up | 0.000040024 | PSME1    | 28.723 | 55.143 | 50.2 |
| P15311  | 1.643 | Up | 5.59E-07    | EZR      | 69.412 | 277.54 | 50.7 |
| O60701  | 1.641 | Up | 0.00070035  | UGDH     | 55.023 | 234.65 | 30.8 |
| P47895  | 1.639 | Up | 1.54E-05    | ALDH1A3  | 56.108 | 156.91 | 39.5 |
| Q9Y5X2  | 1.639 | Up | 0.0113784   | SNX8     | 52.569 | 23.179 | 18.9 |
| O95685  | 1.638 | Up | 0.000120837 | PPP1R3D  | 32.559 | 28.461 | 26.1 |
| Q6ZSS7  | 1.637 | Up | 0.030418    | MFSD6    | 88.087 | 15.994 | 3.5  |
| P31949  | 1.636 | Up | 0.000064767 | S100A11  | 11.74  | 24.756 | 52.4 |
| P50454  | 1.636 | Up | 0.0024616   | SERPINH1 | 46.44  | 12.846 | 13.9 |
| O14896  | 1.635 | Up | 0.00074007  | IRF6     | 53.129 | 47.189 | 16.9 |
| Q5VT25  | 1.635 | Up | 0.00002043  | CDC42BPA | 197.3  | 2.954  | 3.3  |
| Q9NQ R4 | 1.634 | Up | 0.000184206 | NIT2     | 30.608 | 107.5  | 23.6 |
| P13489  | 1.632 | Up | 1.03E-06    | RNH1     | 49.973 | 323.31 | 41   |
| Q9Y6Q5  | 1.626 | Up | 0.00020103  | AP1M2    | 48.108 | 52.011 | 21   |
| Q9H8M7  | 1.626 | Up | 0.0031206   | MINDY3   | 49.724 | 24.075 | 8.3  |

|         |       |    |             |         |        |        |      |
|---------|-------|----|-------------|---------|--------|--------|------|
| Q8NB37  | 1.624 | Up | 0.00032286  | GATD1   | 23.297 | 6.5047 | 10.5 |
| O00299  | 1.623 | Up | 0.000037581 | CLIC1   | 26.922 | 323.31 | 66   |
| O94903  | 1.622 | Up | 0.00027968  | PLPBP   | 30.344 | 17.363 | 16   |
| P41743  | 1.616 | Up | 1.90E-06    | PRKCI   | 68.262 | 19.305 | 6.9  |
| P45974  | 1.615 | Up | 0.000041935 | USP5    | 95.785 | 216.83 | 27   |
| Q9Y5Z4  | 1.614 | Up | 0.000081001 | HEBP2   | 22.875 | 27.081 | 30.7 |
| P61224  | 1.612 | Up | 1.65E-05    | RAP1B   | 20.825 | 15.229 | 36.4 |
| Q00796  | 1.608 | Up | 0.00023638  | SORD    | 38.324 | 323.31 | 64.4 |
| Q9BSD7  | 1.608 | Up | 0.0038953   | NTPCR   | 20.713 | 16.878 | 25.3 |
| Q9NQ79  | 1.605 | Up | 0.00127528  | CRTAC1  | 71.42  | 34.395 | 14.1 |
| P68104  | 1.604 | Up | 0.000180423 | EEF1A1  | 50.14  | 305.34 | 49.4 |
| Q3MIR4  | 1.604 | Up | 0.0033183   | TMEM30B | 38.941 | 2.7218 | 6    |
| P06753  | 1.603 | Up | 0.00053609  | TPM3    | 32.95  | 28.799 | 26.7 |
| Q15034  | 1.603 | Up | 0.006663    | HERC3   | 117.19 | 2.5592 | 1    |
| Q7RTZ1  | 1.597 | Up | 0.00112287  | OVCH2   | 62.641 | 40.572 | 12.4 |
| P61586  | 1.595 | Up | 0.0054817   | RHOA    | 21.768 | 16.157 | 34.7 |
| O94830  | 1.593 | Up | 0.0059156   | DDHD2   | 81.031 | 5.5413 | 5.2  |
| Q9NXC5  | 1.593 | Up | 0.0110617   | MIOS    | 98.583 | 3.4663 | 1.7  |
| P22314  | 1.592 | Up | 0.00040366  | UBA1    | 117.85 | 323.31 | 34.9 |
| P35625  | 1.592 | Up | 0.0047823   | TIMP3   | 24.145 | 47.825 | 35.5 |
| O43396  | 1.591 | Up | 0.000036738 | TXNL1   | 32.251 | 243.56 | 58.8 |
| Q14894  | 1.591 | Up | 0.0002629   | CRYM    | 33.775 | 73.472 | 36.9 |
| P49427  | 1.587 | Up | 0.0027244   | CDC34   | 26.736 | 3.6151 | 4.7  |
| Q96A49  | 1.586 | Up | 0.000064084 | SYAP1   | 39.933 | 9.5633 | 13.4 |
| Q13526  | 1.586 | Up | 0.0149834   | PIN1    | 18.243 | 40.953 | 21.5 |
| P49354  | 1.583 | Up | 0.000156137 | FNTA    | 44.408 | 13.303 | 13.7 |
| O14990  | 1.583 | Up | 0.0055775   | PPP1R2C | 22.659 | 52.304 | 15.8 |
| Q08209  | 1.582 | Up | 0.00007709  | PPP3CA  | 58.687 | 48.305 | 20.7 |
| P00491  | 1.582 | Up | 1.62E-05    | PNP     | 32.118 | 85.331 | 34.3 |
| Q9Y6E0  | 1.582 | Up | 0.0184044   | STK24   | 49.307 | 66.344 | 23.3 |
| P42566  | 1.581 | Up | 1.15E-06    | EPS15   | 98.655 | 102.93 | 22.1 |
| Q96IU4  | 1.579 | Up | 0.020978    | ABHD14B | 22.345 | 80.476 | 32.9 |
| P02730  | 1.579 | Up | 0.0062395   | SLC4A1  | 101.79 | 4.7125 | 1.4  |
| Q8IUZ5  | 1.578 | Up | 0.0104998   | PHYKPL  | 49.71  | 5.4084 | 4.9  |
| P38571  | 1.578 | Up | 0.000159266 | LIPA    | 45.418 | 30.276 | 6.8  |
| Q14185  | 1.576 | Up | 0.0053604   | DOCK1   | 215.34 | 12.832 | 4.8  |
| P61981  | 1.575 | Up | 0.00150349  | YWHAG   | 28.302 | 60.921 | 38.5 |
| B3GLJ2  | 1.573 | Up | 0.0003363   | PATE3   | 11.747 | 34.864 | 41.8 |
| Q8I WV7 | 1.573 | Up | 0.0063235   | UBR1    | 200.21 | 14.315 | 2.1  |
| Q9Y3F4  | 1.571 | Up | 0.000096781 | STRAP   | 38.438 | 191.93 | 41.4 |
| Q9UJU6  | 1.571 | Up | 0.000124224 | DBNL    | 48.207 | 155.83 | 23   |
| O43741  | 1.565 | Up | 0.00002167  | PRKAB2  | 30.302 | 2.7598 | 4    |
| O43657  | 1.564 | Up | 0.000060238 | TSPAN6  | 27.563 | 61.571 | 15.1 |
| P51812  | 1.561 | Up | 0.000155702 | RPS6KA3 | 83.735 | 67.057 | 31.9 |
| Q7Z4W1  | 1.561 | Up | 0.0010784   | DCXR    | 25.913 | 190.48 | 60.7 |
| O43520  | 1.561 | Up | 0.00020326  | ATP8B1  | 143.69 | 35.218 | 5    |
| P0DMV9  | 1.56  | Up | 0.000117339 | HSPA1B  | 70.051 | 323.31 | 51.8 |

|        |       |    |             |          |        |        |      |
|--------|-------|----|-------------|----------|--------|--------|------|
| P35573 | 1.559 | Up | 0.000022978 | AGL      | 174.76 | 169.23 | 22.6 |
| Q8IYB7 | 1.559 | Up | 0.0137635   | DIS3L2   | 99.278 | 6.0213 | 5.6  |
| Q9Y5P6 | 1.557 | Up | 0.000039215 | GMPPB    | 39.834 | 87.222 | 31.1 |
| Q02750 | 1.557 | Up | 0.000136446 | MAP2K1   | 43.439 | 10.866 | 13.5 |
| O15327 | 1.557 | Up | 0.0139962   | INPP4B   | 104.74 | 33.433 | 10.3 |
| P09543 | 1.556 | Up | 2.08E-06    | CNP      | 47.578 | 175.16 | 39.7 |
| Q969M3 | 1.555 | Up | 0.0072956   | YIPF5    | 27.989 | 2.2946 | 4.7  |
| Q9NQX4 | 1.554 | Up | 0.00030194  | MYO5C    | 202.81 | 28.543 | 6.1  |
| P55327 | 1.554 | Up | 0.000036474 | TPD52    | 24.327 | 25.113 | 19.2 |
| Q9HA65 | 1.554 | Up | 0.00002419  | TBC1D17  | 72.727 | 42.145 | 5.6  |
| P60981 | 1.553 | Up | 0.000064985 | DSTN     | 18.506 | 61.726 | 35.2 |
| P08134 | 1.552 | Up | 0.0086218   | RHOC     | 22.006 | 33.865 | 35.2 |
| P40121 | 1.552 | Up | 0.000040097 | CAPG     | 38.498 | 65.699 | 23.3 |
| O00571 | 1.548 | Up | 0.038941    | DDX3X    | 73.243 | 57.015 | 17.2 |
| P02794 | 1.547 | Up | 0.0084832   | FTH1     | 21.225 | 73.962 | 47   |
| P31153 | 1.546 | Up | 0.0093043   | MAT2A    | 43.66  | 48.356 | 27.3 |
| P08697 | 1.546 | Up | 0.0145197   | SERPINF2 | 54.565 | 17.72  | 11.4 |
| O95786 | 1.545 | Up | 0.0044761   | DDX58    | 106.6  | 13.92  | 7.6  |
| Q9UHY1 | 1.544 | Up | 0.0063791   | NRBP1    | 59.844 | 38.885 | 13.5 |
| Q6ZS30 | 1.544 | Up | 0.0083008   | NBEAL1   | 307.23 | 4.1604 | 0.7  |
| Q14914 | 1.542 | Up | 0.000035908 | PTGR1    | 35.869 | 126.89 | 30.4 |
| P49588 | 1.541 | Up | 1.35E-06    | AARS     | 106.81 | 263.48 | 36.4 |
| P62937 | 1.541 | Up | 0.00052271  | PPIA     | 18.012 | 82.332 | 51.5 |
| O95671 | 1.541 | Up | 0.000104465 | ASMTL    | 68.856 | 63.239 | 15.5 |
| Q08257 | 1.539 | Up | 0.000036018 | CRYZ     | 35.206 | 35.601 | 32.8 |
| Q9H2K8 | 1.538 | Up | 0.0002607   | TAOK3    | 105.4  | 144.84 | 24.1 |
| P34949 | 1.538 | Up | 0.00103825  | MPI      | 46.655 | 130.78 | 14.9 |
| Q9H299 | 1.538 | Up | 0.00053654  | SH3BGRL3 | 10.438 | 9.1263 | 36.6 |
| Q04637 | 1.537 | Up | 0.000098883 | EIF4G1   | 175.49 | 155.78 | 22.3 |
| O95394 | 1.535 | Up | 0.000084593 | PGM3     | 59.851 | 145.94 | 36.3 |
| Q8NHP8 | 1.535 | Up | 0.036739    | PLBD2    | 65.471 | 12.572 | 2.2  |
| P20337 | 1.534 | Up | 0.00088087  | RAB3B    | 24.758 | 143.26 | 35.2 |
| Q15847 | 1.533 | Up | 0.00041825  | ADIRF    | 7.8547 | 128.13 | 80.3 |
| Q9NR45 | 1.532 | Up | 0.0008975   | NANS     | 40.307 | 111.99 | 41.5 |
| Q92905 | 1.532 | Up | 4.88E-06    | COPS5    | 37.578 | 92.613 | 26.3 |
| Q92743 | 1.529 | Up | 0.0037177   | HTRA1    | 51.286 | 52.139 | 20.8 |
| P35080 | 1.529 | Up | 1.83E-05    | PFN2     | 15.046 | 216.15 | 33.6 |
| Q9NZL9 | 1.528 | Up | 0.000175746 | MAT2B    | 37.551 | 135.16 | 29.3 |
| Q9Y696 | 1.525 | Up | 0.00075943  | CLIC4    | 28.772 | 149.36 | 35.6 |
| Q9BQG2 | 1.525 | Up | 3.98E-06    | NUDT12   | 52.075 | 6.0539 | 7.8  |
| Q9NP61 | 1.524 | Up | 0.000178068 | ARFGAP3  | 56.928 | 56.726 | 22.7 |
| P56851 | 1.523 | Up | 0.000017228 | EDDM3B   | 17.584 | 71.819 | 44.2 |
| O43813 | 1.523 | Up | 0.00080405  | LANCL1   | 45.283 | 17.78  | 18.5 |
| Q8N335 | 1.522 | Up | 0.000101877 | GPD1L    | 38.418 | 101.8  | 42.5 |
| Q9Y3C8 | 1.522 | Up | 0.00045583  | UFC1     | 19.458 | 4.5868 | 11.4 |
| Q96QK1 | 1.521 | Up | 0.000062458 | VPS35    | 91.706 | 135.64 | 23.5 |
| Q96DH6 | 1.52  | Up | 0.0119013   | MSI2     | 35.196 | 9.5477 | 10.1 |

|        |       |    |             |          |        |        |   |
|--------|-------|----|-------------|----------|--------|--------|---|
| P08865 | 1.519 | Up | 0.000175667 | RPSA     | 32.854 | 191.83 | : |
| Q9P2X3 | 1.519 | Up | 9.13E-07    | IMPACT   | 36.476 | 75.166 | : |
| Q9NSY2 | 1.519 | Up | 0.00121879  | STARD5   | 23.794 | 3.2251 | : |
| P51888 | 1.517 | Up | 0.000055142 | PRELP    | 43.809 | 19.941 | : |
| O60763 | 1.513 | Up | 0.000075802 | USO1     | 107.89 | 323.31 | : |
| Q16222 | 1.513 | Up | 0.00034071  | UAP1     | 58.768 | 48.924 | : |
| Q7L1Q6 | 1.512 | Up | 0.000024468 | BZW1     | 48.043 | 25.84  | : |
| Q9HAB8 | 1.512 | Up | 0.0045177   | PPCS     | 34.005 | 18.806 | : |
| O43681 | 1.512 | Up | 0.000020611 | ASNA1    | 38.792 | 21.492 | : |
| P0CG33 | 1.511 | Up | 0.0052838   | GOLGA6D  | 79.895 | 50.369 | : |
| Q9UEW8 | 1.511 | Up | 0.000163368 | STK39    | 59.473 | 94.599 | : |
| P35754 | 1.508 | Up | 0.00030219  | GLRX     | 11.776 | 5.5022 | : |
| Q8IYW4 | 1.507 | Up | 0.004299    | ENTHD1   | 67.537 | 4.6358 | : |
| O95372 | 1.506 | Up | 0.00031509  | LYPLA2   | 24.737 | 36.067 | : |
| P57076 | 1.505 | Up | 0.00099504  | C21orf59 | 33.224 | 12.37  | : |
| P20042 | 1.504 | Up | 0.00168367  | EIF2S2   | 38.388 | 76.122 | : |
| O95716 | 1.503 | Up | 0.00073705  | RAB3D    | 24.267 | 97.392 | : |
| Q9GZZ9 | 1.503 | Up | 0.0033381   | UBA5     | 44.863 | 20.02  | : |
| P62942 | 1.503 | Up | 0.00039976  | FKBP1A   | 11.951 | 89.12  | : |
| P28482 | 1.502 | Up | 0.000080778 | MAPK1    | 41.389 | 51.677 | : |
| Q96DG6 | 1.502 | Up | 0.00002231  | CMBL     | 28.048 | 17.68  | : |
| P35237 | 1.5   | Up | 0.00029868  | SERPINB6 | 42.621 | 292.47 | : |
| Q93099 | 1.5   | Up | 0.0093005   | HGD      | 49.963 | 64.65  | : |
| O43175 | 1.499 | Up | 0.000075352 | PHGDH    | 56.65  | 323.31 | : |
| P52565 | 1.496 | Up | 0.000156491 | ARHGDI   | 23.207 | 187.25 | : |
| Q9UNS2 | 1.494 | Up | 0.00086097  | COPS3    | 47.873 | 45.865 | : |
| O75663 | 1.494 | Up | 0.00025975  | TIPRL    | 31.444 | 27.781 | : |
| P14324 | 1.494 | Up | 1.58E-05    | FDPS     | 48.275 | 57.579 | : |
| Q8NBF2 | 1.493 | Up | 0.0002824   | NHLRC2   | 79.443 | 110.7  | : |
| O60547 | 1.493 | Up | 0.00024241  | GMDS     | 41.949 | 65.934 | : |
| Q16890 | 1.493 | Up | 0.0052447   | TPD52L1  | 22.449 | 12.404 | : |
| P09382 | 1.492 | Up | 0.00022271  | LGALS1   | 14.716 | 20.412 | : |
| Q9UGI8 | 1.491 | Up | 0.000036161 | TES      | 47.996 | 72.906 | : |
| O75347 | 1.491 | Up | 0.000181444 | TBCA     | 12.855 | 61.332 | : |
| O76003 | 1.491 | Up | 0.00117694  | GLRX3    | 37.432 | 30.814 | : |
| Q8IVD9 | 1.491 | Up | 0.0003392   | NUDCD3   | 40.822 | 13.134 | : |
| Q2TAA2 | 1.491 | Up | 0.0026581   | IAH1     | 27.598 | 2.2195 | : |
| P31947 | 1.49  | Up | 0.000039988 | SFN      | 27.774 | 56.925 | : |
| Q07960 | 1.49  | Up | 0.0006378   | ARHGAP1  | 50.435 | 46.074 | : |
| Q9BZE9 | 1.49  | Up | 0.00115856  | ASPSCR1  | 60.182 | 12.359 | : |
| Q86V88 | 1.49  | Up | 0.0029029   | MDP1     | 20.109 | 3.0182 | : |
| P16152 | 1.489 | Up | 0.00022206  | CBR1     | 30.375 | 249.3  | : |
| Q9UK22 | 1.487 | Up | 0.0095832   | FBXO2    | 33.327 | 17.175 | : |
| P60953 | 1.486 | Up | 0.000124739 | CDC42    | 21.258 | 51.721 | : |
| P27487 | 1.485 | Up | 0.00087764  | DPP4     | 88.278 | 285.44 | : |
| Q9Y2Z0 | 1.484 | Up | 0.0115646   | SUGT1    | 41.024 | 100.62 | : |
| Q15121 | 1.483 | Up | 0.00092345  | PEA15    | 15.04  | 7.9454 | : |

|        |       |    |             |          |        |        |      |
|--------|-------|----|-------------|----------|--------|--------|------|
| P55212 | 1.481 | Up | 0.000179256 | CASP6    | 33.31  | 21.633 | 20.8 |
| Q15181 | 1.48  | Up | 0.00023645  | PPA1     | 32.66  | 150.51 | 50.2 |
| Q16204 | 1.48  | Up | 0.020159    | CCDC6    | 53.29  | 78.233 | 17.5 |
| Q96HC4 | 1.479 | Up | 0.00023792  | PDLIM5   | 63.944 | 126.76 | 27.7 |
| Q14117 | 1.479 | Up | 0.00034086  | DPYS     | 56.629 | 5.9315 | 7.5  |
| Q0PNE2 | 1.478 | Up | 0.00075834  | ELP6     | 29.793 | 6.2502 | 13.5 |
| P13639 | 1.477 | Up | 0.00160211  | EEF2     | 95.337 | 323.31 | 43.7 |
| Q13409 | 1.477 | Up | 0.00097886  | DYNC1I2  | 71.456 | 83.008 | 10.8 |
| Q5R3I4 | 1.477 | Up | 0.000080882 | TTC38    | 52.787 | 12.768 | 9.4  |
| Q9GZP4 | 1.477 | Up | 0.0034423   | PITHD1   | 24.178 | 101.38 | 19.9 |
| P22234 | 1.476 | Up | 6.60E-08    | PAICS    | 47.079 | 132.35 | 30.4 |
| P63027 | 1.476 | Up | 0.003836    | VAMP2    | 12.663 | 72.613 | 34.5 |
| Q96EB1 | 1.475 | Up | 0.041564    | ELP4     | 46.587 | 8.1915 | 6.6  |
| P46109 | 1.474 | Up | 0.0031396   | CRKL     | 33.777 | 23.918 | 11.6 |
| Q7Z3C6 | 1.473 | Up | 0.0021422   | ATG9A    | 94.446 | 4.5465 | 2.9  |
| P41567 | 1.472 | Up | 0.0109439   | EIF1     | 12.732 | 10.947 | 13.3 |
| P61758 | 1.471 | Up | 0.00044445  | VBP1     | 22.658 | 8.1442 | 18.3 |
| Q6PD74 | 1.47  | Up | 0.0027018   | AAGAB    | 34.593 | 7.1497 | 7    |
| P62879 | 1.469 | Up | 0.000037245 | GNB2     | 37.331 | 108.53 | 26.5 |
| O95865 | 1.469 | Up | 0.000023452 | DDAH2    | 29.644 | 57.649 | 37.9 |
| Q9UHD1 | 1.469 | Up | 0.000161037 | CHORDC1  | 37.489 | 41.395 | 28   |
| Q5T6V5 | 1.469 | Up | 1.68E-05    | C9orf64  | 39.028 | 19.042 | 13.5 |
| Q8NA61 | 1.468 | Up | 0.000056228 | SPERT    | 51.57  | 154.59 | 45.5 |
| Q99426 | 1.467 | Up | 0.0007756   | TBCB     | 27.325 | 52.721 | 30.3 |
| Q9BUT1 | 1.467 | Up | 0.0042583   | BDH2     | 26.724 | 9.156  | 13.9 |
| P36959 | 1.465 | Up | 2.87E-06    | GMPR     | 37.418 | 102.34 | 36.2 |
| Q00688 | 1.464 | Up | 0.0003965   | FKBP3    | 25.177 | 25.953 | 25.9 |
| Q99873 | 1.464 | Up | 0.000178173 | PRMT1    | 42.461 | 38.986 | 19.7 |
| Q8N0X7 | 1.462 | Up | 0.0067624   | SPART    | 72.832 | 24.363 | 12   |
| P49327 | 1.46  | Up | 0.000020068 | FASN     | 273.42 | 323.31 | 38.6 |
| Q96KP1 | 1.46  | Up | 0.0035411   | EXOC2    | 104.07 | 35.328 | 9    |
| Q9Y366 | 1.46  | Up | 0.0090979   | IFT52    | 49.706 | 9.1951 | 7.3  |
| P62633 | 1.46  | Up | 0.0068791   | CNBP     | 19.463 | 15.67  | 8.5  |
| Q96FC7 | 1.46  | Up | 0.0158434   | PHYHIPL  | 42.486 | 6.0137 | 5.9  |
| Q8TCT9 | 1.459 | Up | 0.00024203  | HM13     | 41.488 | 102.3  | 12.7 |
| P17707 | 1.459 | Up | 0.00025805  | AMD1     | 38.339 | 5.6989 | 3.9  |
| O43776 | 1.458 | Up | 6.23E-07    | NARS     | 62.942 | 155.88 | 27.6 |
| P11142 | 1.457 | Up | 1.66E-06    | HSPA8    | 70.897 | 323.31 | 66.7 |
| Q08499 | 1.457 | Up | 0.00029544  | PDE4D    | 91.114 | 8.1689 | 4.8  |
| Q9Y6G9 | 1.455 | Up | 0.000020879 | DYNC1LI1 | 56.578 | 75.796 | 26.4 |
| P63208 | 1.455 | Up | 0.000076382 | SKP1     | 18.658 | 39.217 | 28.8 |
| Q9UBQ7 | 1.453 | Up | 0.000135495 | GRHPR    | 35.668 | 99.979 | 36.3 |
| Q14444 | 1.453 | Up | 0.000021706 | CAPRIN1  | 78.365 | 22.497 | 6.2  |
| Q8WUM4 | 1.452 | Up | 1.76E-06    | PDCD6IP  | 96.022 | 297.61 | 45.7 |
| P62917 | 1.452 | Up | 0.001921    | RPL8     | 28.024 | 109.61 | 34.2 |
| Q9NRY4 | 1.452 | Up | 0.0174162   | ARHGAP35 | 170.51 | 17.038 | 4.9  |
| Q9HAD4 | 1.452 | Up | 0.04074     | WDR41    | 51.727 | 33.276 | 7.4  |



|        |       |    |             |           |        |        |      |
|--------|-------|----|-------------|-----------|--------|--------|------|
| Q9UNH7 | 1.451 | Up | 0.00032107  | SNX6      | 46.648 | 75.276 | 32.8 |
| P07737 | 1.451 | Up | 0.000076529 | PFN1      | 15.054 | 124.46 | 65   |
| P10768 | 1.451 | Up | 0.00085843  | ESD       | 31.462 | 26.412 | 23.8 |
| Q8N3R9 | 1.451 | Up | 0.0063802   | MPP5      | 77.293 | 36.36  | 14.8 |
| O75312 | 1.45  | Up | 0.026558    | ZPR1      | 50.925 | 13.241 | 11.1 |
| Q14204 | 1.449 | Up | 5.60E-08    | DYNC1H1   | 532.4  | 323.31 | 35.5 |
| P46776 | 1.449 | Up | 0.0028001   | RPL27A    | 16.561 | 56.685 | 28.4 |
| Q92734 | 1.449 | Up | 4.52E-06    | TFG       | 43.447 | 12.827 | 11.8 |
| P53396 | 1.448 | Up | 0.000021478 | ACLY      | 120.84 | 323.31 | 37.1 |
| Q6DKJ4 | 1.448 | Up | 0.0156385   | NXN       | 48.392 | 48.739 | 7.8  |
| O95999 | 1.448 | Up | 0.0041021   | BCL10     | 26.251 | 3.7071 | 8.6  |
| P61088 | 1.447 | Up | 0.000180292 | UBE2N     | 17.138 | 46.204 | 44.7 |
| Q9Y4X5 | 1.447 | Up | 0.00021776  | ARIH1     | 64.117 | 45.758 | 24.1 |
| P55210 | 1.447 | Up | 0.0021797   | CASP7     | 34.276 | 10.768 | 6.9  |
| Q9Y508 | 1.447 | Up | 0.00055959  | RNF114    | 25.694 | 8.4524 | 9.6  |
| O43237 | 1.446 | Up | 0.00085932  | DYNC1LI2  | 54.099 | 25.6   | 18.7 |
| O60684 | 1.445 | Up | 0.0093007   | KPNA6     | 60.029 | 102.05 | 17.4 |
| Q9P260 | 1.445 | Up | 0.00037956  | KIAA1468  | 134.63 | 17.903 | 6.2  |
| Q5SRH9 | 1.445 | Up | 0.003163    | TTC39A    | 69.778 | 9.6436 | 4.6  |
| P07384 | 1.444 | Up | 0.00052276  | CAPN1     | 81.889 | 113.28 | 25.4 |
| O43747 | 1.443 | Up | 0.00032058  | AP1G1     | 91.35  | 169.52 | 16.1 |
| P22392 | 1.443 | Up | 0.00031705  | NME2      | 17.298 | 6.1749 | 46.1 |
| P51993 | 1.443 | Up | 0.0137641   | FUT6      | 41.859 | 36.467 | 12.3 |
| Q96KP4 | 1.442 | Up | 0.000023716 | CNDP2     | 52.878 | 257.57 | 43.6 |
| O43692 | 1.442 | Up | 0.043495    | PII5      | 29.065 | 38.272 | 11.2 |
| P36915 | 1.441 | Up | 0.00057805  | GNL1      | 68.66  | 83.675 | 22.7 |
| P61201 | 1.441 | Up | 4.95E-06    | COPS2     | 51.596 | 92.988 | 24.6 |
| P30626 | 1.44  | Up | 0.00115666  | SRI       | 21.676 | 42.535 | 46   |
| Q9NR19 | 1.439 | Up | 0.000081959 | ACSS2     | 78.579 | 68.486 | 14.8 |
| P49591 | 1.437 | Up | 0.00134111  | SARS      | 58.777 | 48.796 | 19.1 |
| P15531 | 1.437 | Up | 0.00089557  | NME1      | 17.149 | 37.816 | 48   |
| P51178 | 1.437 | Up | 0.031459    | PLCD1     | 85.664 | 4.4582 | 2.9  |
| Q9C0I1 | 1.437 | Up | 0.0031799   | MTMR12    | 86.147 | 35.14  | 4.1  |
| P54803 | 1.435 | Up | 0.00162026  | GALC      | 77.063 | 51.152 | 6.6  |
| P26639 | 1.434 | Up | 1.75E-05    | TARS      | 83.434 | 89.056 | 25.7 |
| Q9ULR3 | 1.434 | Up | 0.0134574   | PPM1H     | 56.447 | 20.778 | 15   |
| Q6ZNW5 | 1.434 | Up | 0.0037156   | GDPGP1    | 42.362 | 6.1781 | 10.1 |
| Q9H0I9 | 1.433 | Up | 0.000021521 | TKTL2     | 67.876 | 186.28 | 27.8 |
| Q10567 | 1.432 | Up | 1.97E-05    | AP1B1     | 104.64 | 114.9  | 23.6 |
| Q9H8Y8 | 1.432 | Up | 0.00097585  | GORASP2   | 47.145 | 4.7883 | 4.4  |
| P21399 | 1.431 | Up | 0.000040759 | ACO1      | 98.398 | 90.119 | 22.7 |
| Q9BXS5 | 1.431 | Up | 0.0172441   | AP1M1     | 48.586 | 17.953 | 18.2 |
| Q8WXR4 | 1.431 | Up | 0.00086457  | MYO3B     | 151.83 | 14.844 | 4.8  |
| Q58FF8 | 1.43  | Up | 0.0035607   | HSP90AB2P | 44.348 | 2.3616 | 25.2 |
| Q96T51 | 1.429 | Up | 0.0115362   | RUFY1     | 79.817 | 53.764 | 16.7 |
| Q53T59 | 1.429 | Up | 0.00027686  | HS1BP3    | 42.78  | 45.5   | 20.7 |
| P20936 | 1.429 | Up | 0.00080328  | RASA1     | 116.4  | 13.611 | 3.2  |

|        |       |    |             |          |        |        |      |
|--------|-------|----|-------------|----------|--------|--------|------|
| Q9BZK7 | 1.429 | Up | 0.00038216  | TBL1XR1  | 55.594 | 9.686  | 5.1  |
| O75928 | 1.429 | Up | 0.0057811   | PIAS2    | 68.24  | 3.2242 | 2.4  |
| P43490 | 1.428 | Up | 0.000176292 | NAMPT    | 55.52  | 132.08 | 34   |
| Q9Y4B6 | 1.428 | Up | 0.0117162   | DCAF1    | 169.01 | 13.193 | 3    |
| P12273 | 1.427 | Up | 0.00030486  | PIP      | 16.572 | 141.85 | 54.8 |
| P51159 | 1.427 | Up | 0.00013849  | RAB27A   | 24.868 | 62.1   | 32.1 |
| Q13443 | 1.427 | Up | 0.020835    | ADAM9    | 90.555 | 83.309 | 11.6 |
| P05783 | 1.426 | Up | 0.0031009   | KRT18    | 48.057 | 127.16 | 39.1 |
| O00159 | 1.425 | Up | 0.000063034 | MYO1C    | 121.68 | 123.79 | 17.6 |
| Q9NRV9 | 1.424 | Up | 0.0001964   | HEBP1    | 21.097 | 40.99  | 31.2 |
| Q9UDY2 | 1.423 | Up | 0.0012426   | TJP2     | 133.96 | 66.559 | 10.8 |
| Q6UWE0 | 1.423 | Up | 0.00548     | LRSAM1   | 83.593 | 56.366 | 15.8 |
| P53611 | 1.423 | Up | 0.041582    | RABGGTB  | 36.924 | 3.7018 | 6    |
| P50502 | 1.422 | Up | 0.000057453 | ST13     | 41.331 | 123.29 | 31.2 |
| Q14689 | 1.422 | Up | 0.015497    | DIP2A    | 170.37 | 24.607 | 5.1  |
| Q96RR4 | 1.422 | Up | 0.00086398  | CAMKK2   | 64.745 | 10.797 | 9    |
| O14772 | 1.422 | Up | 0.045498    | FPGT     | 66.598 | 8.0755 | 4.7  |
| Q9H0U4 | 1.421 | Up | 2.44E-06    | RAB1B    | 22.171 | 84.237 | 66.7 |
| Q16348 | 1.421 | Up | 0.00180439  | SLC15A2  | 81.783 | 20.418 | 10.2 |
| P18077 | 1.421 | Up | 0.00071905  | RPL35A   | 12.538 | 9.91   | 52.7 |
| Q3ZCW2 | 1.421 | Up | 0.00031875  | LGALS1   | 18.986 | 7.124  | 11.6 |
| P61960 | 1.42  | Up | 0.000060278 | UFM1     | 9.1175 | 14.676 | 17.6 |
| Q9Y3A6 | 1.42  | Up | 0.0026208   | TMED5    | 26.005 | 2.9769 | 4.4  |
| Q02790 | 1.419 | Up | 1.84E-05    | FKBP4    | 51.804 | 242.87 | 47.5 |
| Q13237 | 1.419 | Up | 0.000144514 | PRKG2    | 87.431 | 35.163 | 12.9 |
| Q9NR09 | 1.419 | Up | 0.008143    | BIRC6    | 530.25 | 71.254 | 2.7  |
| Q5VZK9 | 1.419 | Up | 0.00105609  | CARMIL1  | 151.56 | 25.11  | 3.7  |
| Q13277 | 1.419 | Up | 0.0003785   | STX3     | 33.155 | 7.8233 | 10.4 |
| P09417 | 1.418 | Up | 0.0024166   | QDPR     | 25.789 | 86.239 | 46.7 |
| Q9NWW4 | 1.418 | Up | 0.00096219  | C1orf123 | 18.048 | 33.617 | 35.6 |
| Q8IY31 | 1.418 | Up | 0.0020825   | IFT20    | 15.28  | 21.509 | 22   |
| P09110 | 1.417 | Up | 0.00163638  | ACAA1    | 44.292 | 132.14 | 30.7 |
| Q9H1M3 | 1.416 | Up | 0.0099183   | DEFB129  | 20.298 | 19.067 | 11.5 |
| P63104 | 1.415 | Up | 0.000081714 | YWHAZ    | 27.745 | 173.13 | 51.8 |
| Q9HB71 | 1.415 | Up | 0.000020474 | CACYBP   | 26.21  | 79.192 | 28.5 |
| Q01518 | 1.414 | Up | 0.00062339  | CAP1     | 51.901 | 128.86 | 44.4 |
| Q14258 | 1.414 | Up | 0.0034031   | TRIM25   | 70.973 | 71.703 | 16.7 |
| P09874 | 1.414 | Up | 0.00027612  | PARP1    | 113.08 | 7.135  | 2.6  |
| Q12765 | 1.413 | Up | 0.00045544  | SCRN1    | 46.382 | 51.805 | 14   |
| Q9NZZ3 | 1.413 | Up | 0.00006046  | CHMP5    | 24.57  | 67.913 | 34.7 |
| P15170 | 1.412 | Up | 0.00024368  | GSPT1    | 55.755 | 103.63 | 30.7 |
| P07902 | 1.412 | Up | 0.0049596   | GALT     | 43.363 | 19.195 | 10.8 |
| P01133 | 1.412 | Up | 0.0023398   | EGF      | 133.99 | 2.6233 | 1.9  |
| Q9UL33 | 1.412 | Up | 0.00143936  | TRAPPC2L | 16.145 | 3.8884 | 12.9 |
| P35813 | 1.41  | Up | 0.00194181  | PPM1A    | 42.447 | 32.198 | 26.7 |
| P54725 | 1.41  | Up | 0.042605    | RAD23A   | 39.609 | 7.9459 | 14.9 |
| Q13596 | 1.409 | Up | 4.12E-06    | SNX1     | 59.069 | 69.57  | 24.9 |

|        |       |      |             |           |        |        |      |
|--------|-------|------|-------------|-----------|--------|--------|------|
| Q8IUC4 | 1.408 | Up   | 0.0141361   | RHPN2     | 76.992 | 30.089 | 14   |
| Q8NC51 | 1.408 | Up   | 0.0042812   | SERBP1    | 44.965 | 17.221 | 17.2 |
| Q9BTW9 | 1.407 | Up   | 0.00029718  | TBCD      | 132.6  | 91.9   | 13.1 |
| P42025 | 1.407 | Up   | 0.0018426   | ACTR1B    | 42.293 | 78.703 | 29.8 |
| Q9NV70 | 1.407 | Up   | 0.00020239  | EXOC1     | 101.98 | 17.561 | 6.6  |
| O95989 | 1.407 | Up   | 0.000064833 | NUDT3     | 19.471 | 15.78  | 16.9 |
| O00410 | 1.405 | Up   | 1.56E-05    | IPO5      | 123.63 | 318.26 | 28.2 |
| O15296 | 1.405 | Up   | 1.87E-05    | ALOX15B   | 75.856 | 149.37 | 25   |
| Q66K79 | 1.404 | Up   | 0.00195518  | CPZ       | 73.655 | 198.59 | 26.7 |
| Q8WVM8 | 1.404 | Up   | 0.000035155 | SCFD1     | 72.379 | 189.52 | 30.1 |
| Q9NTK5 | 1.404 | Up   | 0.00023655  | OLA1      | 44.743 | 58.352 | 30.8 |
| P63010 | 1.403 | Up   | 0.00100339  | AP2B1     | 104.55 | 38.547 | 18.9 |
| Q92973 | 1.403 | Up   | 0.000075517 | TNPO1     | 102.35 | 44.072 | 11   |
| O00204 | 1.403 | Up   | 0.00049538  | SULT2B1   | 41.307 | 41.478 | 20.5 |
| Q92882 | 1.403 | Up   | 0.0139361   | OSTF1     | 23.787 | 49.21  | 15.4 |
| P63000 | 1.402 | Up   | 0.0090441   | RAC1      | 21.45  | 41.722 | 47.9 |
| O43765 | 1.402 | Up   | 0.000058973 | SGTA      | 34.063 | 47.702 | 14.4 |
| P55263 | 1.402 | Up   | 0.000155558 | ADK       | 40.545 | 12.153 | 12.4 |
| Q99471 | 1.402 | Up   | 0.00071628  | PFDN5     | 17.328 | 30.026 | 31.2 |
| Q7Z4S6 | 1.401 | Up   | 0.0004993   | KIF21A    | 187.18 | 36.597 | 6.9  |
| Q9P0L0 | 0.714 | Down | 0.000103858 | VAPA      | 27.893 | 42.798 | 51   |
| P07954 | 0.713 | Down | 4.22E-06    | FH        | 54.636 | 209.22 | 34.3 |
| Q8NBJ4 | 0.713 | Down | 0.0033183   | GOLM1     | 45.333 | 17.244 | 12.2 |
| Q8ND07 | 0.713 | Down | 0.00098203  | BBOF1     | 61.986 | 12.709 | 11.5 |
| B4DYI2 | 0.712 | Down | 0.037244    | SPATA31C2 | 124.43 | 106.32 | 17.4 |
| Q5JX71 | 0.712 | Down | 0.00057952  | FAM209A   | 19.603 | 25.313 | 33.9 |
| O75439 | 0.712 | Down | 0.00059885  | PMPCB     | 54.366 | 2.701  | 3.5  |
| Q9NWU1 | 0.712 | Down | 0.000095812 | OXSM      | 48.842 | 21.5   | 5.7  |
| O75976 | 0.711 | Down | 0.000160274 | CPD       | 152.93 | 243.74 | 20   |
| P13804 | 0.711 | Down | 0.00166083  | ETFA      | 35.079 | 157.68 | 46.8 |
| Q7Z4H3 | 0.711 | Down | 0.000023202 | HDDC2     | 23.39  | 69.113 | 39.2 |
| Q86YB8 | 0.711 | Down | 0.000123742 | ERO1B     | 53.543 | 45.653 | 20.8 |
| Q7L266 | 0.71  | Down | 0.0060784   | ASRGL1    | 32.054 | 191.74 | 44.2 |
| P98187 | 0.71  | Down | 0.0085177   | CYP4F8    | 59.994 | 8.3943 | 8.1  |
| Q9BQS8 | 0.71  | Down | 0.026182    | FYCO1     | 166.98 | 17.31  | 3.2  |
| Q96JN2 | 0.709 | Down | 0.0011224   | CCDC136   | 134.04 | 323.31 | 33.2 |
| O75694 | 0.709 | Down | 4.15E-06    | NUP155    | 155.2  | 323.31 | 25.9 |
| P11169 | 0.709 | Down | 0.00052372  | SLC2A3    | 53.924 | 308.24 | 14.3 |
| P21796 | 0.709 | Down | 0.00024469  | VDAC1     | 30.772 | 64.093 | 26.1 |
| P09237 | 0.709 | Down | 0.00088303  | MMP7      | 29.676 | 6.9121 | 12   |
| O43772 | 0.709 | Down | 0.00038151  | SLC25A20  | 32.943 | 21.748 | 19.3 |
| P42898 | 0.709 | Down | 0.00023853  | MTHFR     | 74.596 | 10.973 | 7.3  |
| Q9UIJ7 | 0.709 | Down | 0.0026779   | AK3       | 25.565 | 13.778 | 20.7 |
| Q4G1C9 | 0.709 | Down | 0.027622    | GLIPR1L2  | 40.179 | 13.173 | 11.6 |
| Q5JQC9 | 0.708 | Down | 1.88E-05    | AKAP4     | 94.476 | 323.31 | 82.9 |
| Q6X784 | 0.708 | Down | 0.00082307  | ZBP2      | 38.652 | 69.084 | 22.8 |
| Q9BY14 | 0.708 | Down | 0.00062242  | TEX101    | 26.667 | 24.399 | 12.9 |

|        |       |      |             |          |        |        |      |
|--------|-------|------|-------------|----------|--------|--------|------|
| Q4V328 | 0.708 | Down | 0.0057995   | GRIPAP1  | 95.988 | 34.379 | 6.5  |
| P67812 | 0.707 | Down | 0.00052325  | SEC11A   | 20.625 | 35.777 | 35.2 |
| Q13547 | 0.707 | Down | 0.0092811   | HDAC1    | 55.102 | 3.6848 | 4.1  |
| O75969 | 0.706 | Down | 3.53E-06    | AKAP3    | 94.75  | 323.31 | 59.8 |
| P63167 | 0.706 | Down | 0.0048837   | DYNLL1   | 10.366 | 70.445 | 64   |
| Q9Y5B8 | 0.706 | Down | 0.000157316 | NME7     | 42.491 | 120.05 | 42.8 |
| P10398 | 0.706 | Down | 0.0109037   | ARAF     | 67.585 | 35.961 | 14.5 |
| A6NF34 | 0.705 | Down | 0.0029605   | ANTXRL   | 70.628 | 15.37  | 6.2  |
| Q13748 | 0.704 | Down | 0.000137206 | TUBA3C   | 49.959 | 323.31 | 51.6 |
| Q86XH1 | 0.704 | Down | 0.00124414  | IQCA1    | 95.34  | 9.8277 | 5.1  |
| P28331 | 0.703 | Down | 0.00172176  | NDUFS1   | 79.467 | 137.83 | 33.7 |
| Q8WYR4 | 0.703 | Down | 0.000141013 | RSPH1    | 35.123 | 143.89 | 35.6 |
| Q8WXX0 | 0.702 | Down | 0.000123918 | DNAH7    | 461.15 | 323.31 | 19.9 |
| P31930 | 0.702 | Down | 0.000117455 | UQCRC1   | 52.645 | 249.77 | 40.4 |
| P57678 | 0.702 | Down | 4.58E-06    | GEMIN4   | 120.04 | 28.005 | 5.6  |
| B1ANS9 | 0.702 | Down | 0.0021584   | WDR64    | 123.63 | 18.487 | 3.9  |
| Q6PGQ1 | 0.702 | Down | 0.023458    | DRICH1   | 25.064 | 48.112 | 14.8 |
| Q8NEY3 | 0.702 | Down | 0.0125959   | SPATA4   | 34.751 | 24.751 | 13.8 |
| Q9BUK6 | 0.702 | Down | 0.00122433  | MSTO1    | 61.835 | 30.92  | 6.3  |
| O95399 | 0.702 | Down | 0.0074244   | UTS2     | 14.295 | 2.08   | 6.5  |
| Q8NFH5 | 0.701 | Down | 0.00062166  | NUP35    | 34.773 | 55.412 | 32.2 |
| P13637 | 0.7   | Down | 0.00004232  | ATP1A3   | 111.75 | 71.075 | 26.2 |
| Q9UFE4 | 0.7   | Down | 0.000117212 | CCDC39   | 109.9  | 68.039 | 17.2 |
| P31942 | 0.7   | Down | 0.0134206   | HNRNPH3  | 36.926 | 22.271 | 19.4 |
| O00534 | 0.7   | Down | 0.014243    | VWA5A    | 86.488 | 6.6609 | 3.1  |
| Q8NF37 | 0.7   | Down | 0.0058424   | LPCAT1   | 59.151 | 2.3166 | 1.5  |
| O75363 | 0.699 | Down | 0.0208      | BCAS1    | 61.708 | 50.244 | 16.1 |
| Q8NA54 | 0.699 | Down | 0.000080963 | IQUB     | 92.58  | 18.939 | 8.8  |
| Q9Y3Q0 | 0.699 | Down | 0.0059968   | NAALAD2  | 83.59  | 11.68  | 9.7  |
| P02766 | 0.699 | Down | 0.000144733 | TTR      | 15.887 | 14.524 | 9.5  |
| Q00013 | 0.699 | Down | 0.00064217  | MPP1     | 52.296 | 3.0881 | 2.6  |
| P61019 | 0.698 | Down | 0.000077757 | RAB2A    | 23.545 | 323.31 | 80.7 |
| Q8TD57 | 0.698 | Down | 0.000177673 | DNAH3    | 470.77 | 180.55 | 11.4 |
| Q8N7X0 | 0.698 | Down | 1.84E-05    | ADGB     | 189.71 | 22.938 | 3.1  |
| Q9Y2C4 | 0.698 | Down | 0.0063181   | EXOGL    | 41.084 | 43.813 | 9.5  |
| Q8N5Q1 | 0.697 | Down | 0.00117766  | FAM71E2  | 99.913 | 68.753 | 19.7 |
| A2RUT3 | 0.697 | Down | 0.0045767   | TMEM89   | 17.571 | 101.61 | 34   |
| O95881 | 0.697 | Down | 0.00116059  | TXNDC12  | 19.206 | 14.907 | 19.2 |
| Q9NSE4 | 0.696 | Down | 0.000038324 | IARS2    | 113.79 | 109.32 | 19.6 |
| P30042 | 0.696 | Down | 0.0048765   | C21orf33 | 28.17  | 156.24 | 51.1 |
| P49901 | 0.696 | Down | 0.00087549  | SMCP     | 12.767 | 232.13 | 87.9 |
| Q6P2Q9 | 0.696 | Down | 0.0080419   | PRPF8    | 273.6  | 2.1819 | 0.6  |
| Q9BY50 | 0.696 | Down | 0.0030844   | SEC11C   | 21.542 | 2.7849 | 7.8  |
| Q8IYT1 | 0.694 | Down | 0.00031953  | FAM71A   | 63.177 | 254.55 | 37.5 |
| P22695 | 0.694 | Down | 1.96E-05    | UQCRC2   | 48.442 | 266.96 | 41.1 |
| O43615 | 0.693 | Down | 0.0034807   | TIMM44   | 51.355 | 24.56  | 7.3  |
| Q96M34 | 0.692 | Down | 0.0052625   | C3orf30  | 60.162 | 32.187 | 11.2 |

|        |       |      |             |          |        |        |      |
|--------|-------|------|-------------|----------|--------|--------|------|
| P30048 | 0.692 | Down | 0.00170358  | PRDX3    | 27.692 | 46.515 | 28.9 |
| P38646 | 0.691 | Down | 0.000044102 | HSPA9    | 73.68  | 323.31 | 44.3 |
| Q4G0X9 | 0.691 | Down | 0.000022735 | CCDC40   | 130.11 | 76.744 | 15.9 |
| Q8NHS0 | 0.691 | Down | 0.000097485 | DNAJB8   | 25.686 | 96.986 | 43.5 |
| P60673 | 0.691 | Down | 0.00160177  | PFN3     | 14.596 | 45.427 | 27   |
| P0C0L4 | 0.691 | Down | 0.00079977  | C4A      | 192.78 | 42.132 | 6.5  |
| Q32P41 | 0.691 | Down | 0.0029394   | TRMT5    | 58.246 | 1.9289 | 3.5  |
| Q53SZ7 | 0.691 | Down | 0.00107795  | PRR30    | 44.689 | 33.947 | 14.3 |
| P29373 | 0.691 | Down | 0.0002422   | CRABP2   | 15.693 | 19.278 | 30.4 |
| Q9Y6B7 | 0.691 | Down | 0.000163485 | AP4B1    | 83.259 | 3.6659 | 4.1  |
| A8MYV0 | 0.69  | Down | 0.000196907 | DCDC2C   | 40.424 | 14.61  | 14.1 |
| Q6NVY1 | 0.69  | Down | 0.00021752  | HIBCH    | 43.482 | 17.859 | 15.5 |
| P16104 | 0.689 | Down | 0.0041356   | H2AFX    | 15.144 | 18.195 | 28.7 |
| O95427 | 0.689 | Down | 0.0056983   | PIGN     | 105.81 | 2.1674 | 1.1  |
| Q8IYX7 | 0.688 | Down | 0.000084659 | SAXO1    | 54.621 | 270.75 | 73.2 |
| P05091 | 0.688 | Down | 0.0026968   | ALDH2    | 56.381 | 5.599  | 10.4 |
| P24821 | 0.688 | Down | 0.00042222  | TNC      | 240.85 | 34.108 | 2.3  |
| P30533 | 0.688 | Down | 0.000056842 | LRPAP1   | 41.465 | 12.269 | 14   |
| Q8IZQ1 | 0.688 | Down | 0.0063578   | WDFY3    | 395.25 | 2.5479 | 0.8  |
| P55809 | 0.687 | Down | 1.99E-05    | OXCT1    | 56.157 | 199.47 | 37.1 |
| P16562 | 0.687 | Down | 0.000061182 | CRISP2   | 27.259 | 46.296 | 32.5 |
| Q9NU02 | 0.687 | Down | 0.0129154   | ANKEF1   | 86.663 | 21.566 | 6.3  |
| Q8IWG1 | 0.686 | Down | 0.00061725  | WDR63    | 102.93 | 39.982 | 10.1 |
| Q9NZ08 | 0.686 | Down | 0.000055569 | ERAP1    | 107.23 | 52.818 | 9.1  |
| Q5JST6 | 0.685 | Down | 9.20E-08    | EFHC2    | 87.396 | 150.23 | 25.5 |
| Q9NXE4 | 0.685 | Down | 0.0022991   | SMPD4    | 97.809 | 65.41  | 17.6 |
| O14684 | 0.685 | Down | 0.00046201  | PTGES    | 17.102 | 8.7436 | 12.5 |
| O95571 | 0.685 | Down | 0.000084932 | ETHE1    | 27.873 | 3.8853 | 9.1  |
| Q9P2D7 | 0.684 | Down | 0.000142832 | DNAH1    | 493.95 | 234.08 | 11.1 |
| P43304 | 0.684 | Down | 0.00041632  | GPD2     | 80.852 | 44.434 | 18.3 |
| Q9NZ01 | 0.684 | Down | 0.00048165  | TECR     | 36.034 | 12.664 | 14.9 |
| P05496 | 0.684 | Down | 0.004185    | ATP5G1   | 14.277 | 1.715  | 5.1  |
| Q13835 | 0.684 | Down | 0.00052251  | PKP1     | 82.86  | 4.2388 | 2.8  |
| P62072 | 0.684 | Down | 0.000178347 | TIMM10   | 10.333 | 1.7837 | 7.8  |
| Q96S15 | 0.684 | Down | 3.92E-07    | WDR24    | 101.99 | -2     | 0.9  |
| Q8IVF4 | 0.683 | Down | 3.66E-06    | DNAH10   | 514.83 | 323.31 | 15.9 |
| Q9NUJ1 | 0.683 | Down | 0.000022495 | ABHD10   | 33.932 | 87.862 | 34.6 |
| Q02218 | 0.682 | Down | 0.000160017 | OGDH     | 115.93 | 135.12 | 22.6 |
| P11047 | 0.682 | Down | 0.00182336  | LAMC1    | 177.6  | 123.66 | 13.5 |
| Q99623 | 0.682 | Down | 0.000020005 | PHB2     | 33.296 | 108.6  | 38.8 |
| Q9Y697 | 0.682 | Down | 0.0075592   | NFS1     | 50.195 | 76.731 | 25.2 |
| O75425 | 0.682 | Down | 0.0027042   | MOSPD3   | 25.518 | 46.384 | 32.3 |
| P16444 | 0.682 | Down | 0.0042997   | DPEP1    | 45.673 | 3.2071 | 5.4  |
| Q9Y4P1 | 0.682 | Down | 0.020541    | ATG4B    | 44.294 | 25.95  | 5.6  |
| P00568 | 0.681 | Down | 0.00081764  | AK1      | 21.635 | 83.646 | 38.7 |
| Q16775 | 0.681 | Down | 0.0327      | HAGH     | 33.805 | 56.531 | 22.4 |
| Q9H7T0 | 0.681 | Down | 0.00117642  | CATSPERB | 126.92 | 11.183 | 4.1  |

|        |       |      |             |         |        |        |      |
|--------|-------|------|-------------|---------|--------|--------|------|
| Q9Y6R7 | 0.68  | Down | 1.98E-06    | FCGBP   | 572.01 | 39.651 | 2    |
| Q9UDR5 | 0.68  | Down | 1.53E-05    | AASS    | 102.13 | 15.075 | 5.9  |
| Q95994 | 0.679 | Down | 0.0021594   | AGR2    | 19.979 | 121.75 | 22.3 |
| Q8NDV3 | 0.679 | Down | 0.00113813  | SMC1B   | 143.91 | 2.3231 | 1.9  |
| Q96S16 | 0.679 | Down | 0.000163714 | JMJD8   | 36.869 | 2.1941 | 4.8  |
| Q9Y333 | 0.679 | Down | 0.027885    | LSM2    | 10.834 | 25.848 | 20   |
| Q86VS3 | 0.679 | Down | 0.017202    | IQCH    | 117.35 | 22.052 | 1.7  |
| Q86UC2 | 0.678 | Down | 0.00126264  | RSPH3   | 63.686 | 25.05  | 10.2 |
| P08708 | 0.678 | Down | 0.0020773   | RPS17   | 15.55  | 28.411 | 32.6 |
| P24557 | 0.678 | Down | 0.01362     | TBXAS1  | 60.518 | 5.1912 | 4.1  |
| Q6UXN7 | 0.678 | Down | 0.0083421   | TOMM20L | 17.699 | 3.5313 | 12.5 |
| P38117 | 0.677 | Down | 0.00153608  | ETFB    | 27.843 | 59.171 | 30.6 |
| Q8NCN5 | 0.677 | Down | 0.00094386  | PDPR    | 99.363 | 34.09  | 7.7  |
| Q12913 | 0.677 | Down | 2.94E-06    | PTPRJ   | 145.94 | 34.756 | 5.2  |
| Q9Y512 | 0.677 | Down | 0.00043504  | SAMM50  | 51.976 | 13.624 | 8.5  |
| Q9NZ45 | 0.676 | Down | 0.00077611  | CISD1   | 12.199 | 80.297 | 49.1 |
| Q8WUN7 | 0.676 | Down | 0.00035772  | UBTD2   | 26.189 | 64.42  | 27.8 |
| P22033 | 0.676 | Down | 0.000123544 | MUT     | 83.134 | 24.619 | 8.8  |
| P78318 | 0.676 | Down | 0.00031922  | IGBP1   | 39.221 | 21.234 | 20.6 |
| P14543 | 0.676 | Down | 0.00136116  | NID1    | 136.38 | 16.361 | 5.5  |
| A2RU54 | 0.676 | Down | 0.0004802   | HMX2    | 29.598 | 1.7211 | 3.3  |
| Q6PEW0 | 0.675 | Down | 0.00020487  | PRSS54  | 43.832 | 10.78  | 8.9  |
| Q96LK8 | 0.675 | Down | 0.0116551   | SPATA32 | 42.325 | 66.167 | 20.6 |
| Q9H7Z7 | 0.675 | Down | 0.0003838   | PTGES2  | 41.943 | 4.1371 | 6.1  |
| P00505 | 0.674 | Down | 0.00028427  | GOT2    | 47.517 | 98.557 | 34.9 |
| P52948 | 0.674 | Down | 0.00029689  | NUP98   | 197.58 | 104.59 | 11.5 |
| Q1ZYL8 | 0.674 | Down | 0.000043964 | IZUMO4  | 26.51  | 18.528 | 18.5 |
| Q2M329 | 0.674 | Down | 0.00026257  | CCDC96  | 62.71  | 17.463 | 10.5 |
| L0R6Q1 | 0.674 | Down | 0.0125357   | SLC35A4 | 11.133 | 12.77  | 22.3 |
| Q8N1V2 | 0.673 | Down | 0.000083513 | CFAP52  | 68.297 | 170.31 | 28.2 |
| P17568 | 0.673 | Down | 1.30E-06    | NDUFB7  | 16.402 | 19.435 | 33.6 |
| Q9NR28 | 0.673 | Down | 0.0039364   | DIABLO  | 27.131 | 9.0254 | 16.3 |
| P98095 | 0.672 | Down | 0.00023549  | FBLN2   | 126.57 | 24.866 | 4.5  |
| Q9NTI2 | 0.672 | Down | 0.00159553  | ATP8A2  | 129.24 | 5.111  | 2.9  |
| Q96HD1 | 0.672 | Down | 0.0023644   | CRELD1  | 45.439 | 19.221 | 9.5  |
| P01876 | 0.671 | Down | 0.00171952  | IGHA1   | 37.654 | 47.87  | 24.6 |
| Q13505 | 0.671 | Down | 0.00050385  | MTX1    | 51.462 | 55.621 | 13.7 |
| Q9BSF0 | 0.671 | Down | 0.022696    | C2orf88 | 10.97  | 37.649 | 32.6 |
| A6NFZ4 | 0.671 | Down | 0.0025561   | FAM24A  | 11.258 | 40.184 | 41.9 |
| Q5J5C9 | 0.671 | Down | 0.000097285 | DEFB121 | 8.4561 | 11.616 | 31.6 |
| Q68DN1 | 0.67  | Down | 0.0067582   | C2orf16 | 224.32 | 221.56 | 20   |
| Q08722 | 0.67  | Down | 0.00004158  | CD47    | 35.213 | 16.96  | 8.7  |
| P63172 | 0.67  | Down | 0.045063    | DYNLT1  | 12.452 | 22.047 | 14.2 |
| Q9NUQ2 | 0.669 | Down | 0.0024376   | AGPAT5  | 42.072 | 12.543 | 13.2 |
| P36776 | 0.668 | Down | 0.0095224   | LONP1   | 106.49 | 54.96  | 13   |
| Q8NHG7 | 0.667 | Down | 0.000022243 | SVIP    | 8.4426 | 14.092 | 32.5 |
| Q6Y7W6 | 0.667 | Down | 0.00043748  | GIGYF2  | 150.07 | 3.0257 | 2.5  |

|        |       |      |             |          |        |        |      |
|--------|-------|------|-------------|----------|--------|--------|------|
| P02788 | 0.666 | Down | 8.80E-07    | LTF      | 78.181 | 323.31 | 80.3 |
| O95831 | 0.666 | Down | 0.000157594 | AIFM1    | 66.9   | 83.439 | 25.4 |
| Q96M83 | 0.665 | Down | 0.000117437 | CCDC7    | 157.45 | 10.085 | 4.3  |
| Q9P0V3 | 0.665 | Down | 0.0071576   | SH3BP4   | 107.49 | 8.3762 | 5.2  |
| P24752 | 0.664 | Down | 0.00025808  | ACAT1    | 45.199 | 323.31 | 45.2 |
| P04899 | 0.664 | Down | 0.00050444  | GNAI2    | 40.45  | 188    | 45.6 |
| P07858 | 0.664 | Down | 0.00020058  | CTSB     | 37.821 | 25.212 | 12.7 |
| P15586 | 0.664 | Down | 0.00080252  | GNS      | 62.081 | 18.32  | 13.6 |
| Q9P225 | 0.663 | Down | 1.66E-06    | DNAH2    | 507.69 | 244.47 | 8.6  |
| P06576 | 0.662 | Down | 4.35E-06    | ATP5F1B  | 56.559 | 323.31 | 45.6 |
| Q9HAT0 | 0.662 | Down | 0.0115182   | ROPN1    | 23.892 | 99.229 | 41   |
| Q9BTX1 | 0.662 | Down | 4.23E-06    | NDC1     | 76.304 | 70.367 | 17.8 |
| P31937 | 0.662 | Down | 0.000083159 | HIBADH   | 35.329 | 129.39 | 25   |
| Q96KX2 | 0.661 | Down | 0.000157434 | CAPZA3   | 35.024 | 117.17 | 32.8 |
| P08559 | 0.661 | Down | 0.00052397  | PDHA1    | 43.295 | 30.721 | 21.5 |
| Q96T59 | 0.661 | Down | 0.00176368  | CDRT15   | 20.651 | 48.042 | 31.4 |
| P02790 | 0.661 | Down | 0.000138284 | HPX      | 51.676 | 91.835 | 14.9 |
| Q0P670 | 0.661 | Down | 0.0023351   | SPEM2    | 57.13  | 51.556 | 12.2 |
| Q16822 | 0.661 | Down | 0.041176    | PCK2     | 70.698 | 21.651 | 8.9  |
| P55084 | 0.66  | Down | 0.000040496 | HADHB    | 51.294 | 216.87 | 42   |
| Q15120 | 0.66  | Down | 0.0065161   | PKD3     | 46.938 | 11.306 | 6.2  |
| P38567 | 0.659 | Down | 0.00014099  | SPAM1    | 57.847 | 78.105 | 15.5 |
| P09622 | 0.659 | Down | 1.00E-06    | DLD      | 54.177 | 35.465 | 16.7 |
| Q14409 | 0.658 | Down | 0.000138454 | GK3P     | 60.597 | 105.91 | 31.3 |
| Q9Y6C9 | 0.658 | Down | 0.00163828  | MTCH2    | 33.331 | 123.38 | 34.3 |
| P18859 | 0.657 | Down | 0.00011718  | ATP5J    | 12.587 | 167.76 | 55.6 |
| Q9Y5K3 | 0.657 | Down | 0.0166594   | PCYT1B   | 41.94  | 8.797  | 13.8 |
| Q5T440 | 0.657 | Down | 0.00044374  | IBA57    | 38.155 | 9.1715 | 7    |
| Q8IY92 | 0.657 | Down | 0.000077409 | SLX4     | 200.01 | 1.5916 | 0.4  |
| Q00839 | 0.656 | Down | 0.036935    | HNRNPU   | 90.583 | 140.31 | 11.2 |
| Q5VTT2 | 0.655 | Down | 0.000198737 | C9orf135 | 26.445 | 27.133 | 23.1 |
| Q7Z4T9 | 0.654 | Down | 0.00020094  | MAATS1   | 89.954 | 71.951 | 15   |
| Q9NPE6 | 0.654 | Down | 3.41E-06    | SPAG4    | 48.165 | 57.005 | 18.1 |
| P29803 | 0.653 | Down | 0.000157786 | PDHA2    | 42.933 | 144.14 | 35.1 |
| O75843 | 0.653 | Down | 0.0024429   | AP1G2    | 87.116 | 24.32  | 5    |
| Q8TCT7 | 0.653 | Down | 0.000081953 | SPPL2B   | 64.643 | 20.649 | 7.1  |
| P31040 | 0.652 | Down | 0.000058903 | SDHA     | 72.691 | 202.04 | 35.2 |
| O95202 | 0.652 | Down | 0.00054112  | LETM1    | 83.353 | 92.096 | 18.8 |
| Q15836 | 0.652 | Down | 0.00034217  | VAMP3    | 11.309 | 292.93 | 41   |
| Q6PI48 | 0.652 | Down | 0.000056632 | DARS2    | 73.562 | 37.123 | 10.9 |
| P40926 | 0.651 | Down | 1.78E-05    | MDH2     | 35.503 | 323.31 | 55.3 |
| Q5T655 | 0.651 | Down | 0.000057268 | CFAP58   | 103.42 | 253.16 | 34.3 |
| Q9NX63 | 0.651 | Down | 0.00032302  | CHCHD3   | 26.152 | 11.979 | 36.1 |
| Q17RY6 | 0.651 | Down | 0.00041929  | LY6K     | 18.673 | 11.706 | 24.8 |
| P33316 | 0.651 | Down | 0.000058189 | DUT      | 26.563 | 7.132  | 20.6 |
| P56134 | 0.651 | Down | 0.0190189   | ATP5J2   | 10.918 | 16.487 | 25.5 |
| P62805 | 0.65  | Down | 0.00002078  | HIST1H4A | 11.367 | 147.95 | 58.3 |

|        |       |      |             |          |        |        |      |
|--------|-------|------|-------------|----------|--------|--------|------|
| Q92621 | 0.65  | Down | 1.90E-06    | NUP205   | 227.92 | 100.82 | 12.4 |
| Q00325 | 0.65  | Down | 0.000022067 | SLC25A3  | 40.094 | 87.377 | 25.4 |
| O75688 | 0.65  | Down | 0.0061247   | PPM1B    | 52.642 | 14.622 | 12.1 |
| P53597 | 0.649 | Down | 0.00025715  | SUCLG1   | 36.249 | 86.729 | 28   |
| P98160 | 0.649 | Down | 0.00071827  | HSPG2    | 468.83 | 77.795 | 4.3  |
| Q5SRN2 | 0.649 | Down | 0.00025876  | C6orf10  | 61.625 | 73.98  | 29   |
| Q9NPC4 | 0.649 | Down | 0.0140618   | A4GALT   | 40.499 | 6.3816 | 7.4  |
| P08910 | 0.649 | Down | 0.0046388   | ABHD2    | 48.314 | 4.4199 | 5.2  |
| P40939 | 0.648 | Down | 8.17E-08    | HADHA    | 82.999 | 323.31 | 45.7 |
| Q14254 | 0.648 | Down | 0.000055481 | FLOT2    | 47.064 | 52.639 | 31.5 |
| Q9UBX1 | 0.648 | Down | 0.000104231 | CTSF     | 53.365 | 60.998 | 20.7 |
| P42126 | 0.648 | Down | 2.94E-07    | ECI1     | 32.816 | 107.93 | 20.2 |
| Q96I99 | 0.648 | Down | 0.000062368 | SUCLG2   | 46.51  | 63.313 | 24.5 |
| P07910 | 0.648 | Down | 0.00026397  | HNRNPC   | 33.67  | 20.958 | 19   |
| O95822 | 0.648 | Down | 0.000178516 | MLYCD    | 55.003 | 9.1129 | 8.9  |
| P23434 | 0.648 | Down | 0.000039353 | GCSH     | 18.884 | 44.606 | 17.3 |
| Q6P047 | 0.648 | Down | 0.00065988  | C8orf74  | 33.735 | 4.3728 | 7.8  |
| Q9HCP0 | 0.647 | Down | 0.00068383  | CSNK1G1  | 48.511 | 15.059 | 16.8 |
| Q8NEA4 | 0.647 | Down | 0.0023236   | FBXO36   | 22.105 | 1.8041 | 5.3  |
| P25705 | 0.646 | Down | 0.00012274  | ATP5F1A  | 59.75  | 323.31 | 45.6 |
| Q5JU67 | 0.646 | Down | 0.000164142 | CFAP157  | 60.533 | 44.252 | 22.7 |
| Q9H3G5 | 0.646 | Down | 0.000038858 | CPVL     | 54.163 | 57.447 | 16.8 |
| P51970 | 0.646 | Down | 0.00047716  | NDUFA8   | 20.105 | 18.843 | 37.2 |
| O60264 | 0.646 | Down | 0.0037226   | SMARCA5  | 121.9  | 4.6365 | 2.5  |
| B2RV13 | 0.646 | Down | 0.000183437 | CFAP97D1 | 19.546 | 7.2631 | 18.3 |
| Q8NCE2 | 0.646 | Down | 0.0068401   | MTMR14   | 72.203 | 13.474 | 2.9  |
| Q13885 | 0.645 | Down | 0.00044337  | TUBB2A   | 49.906 | 29.456 | 44.3 |
| Q6ZR08 | 0.645 | Down | 0.000036604 | DNAH12   | 356.94 | 128.84 | 10.4 |
| P11177 | 0.645 | Down | 2.15E-06    | PDHB     | 39.233 | 92.342 | 30.1 |
| P14649 | 0.645 | Down | 0.000078904 | MYL6B    | 22.764 | 21.061 | 34.6 |
| P50897 | 0.645 | Down | 0.00062346  | PPT1     | 34.193 | 39.531 | 9.2  |
| P11310 | 0.644 | Down | 0.00016046  | ACADM    | 46.588 | 137.83 | 39.4 |
| O95995 | 0.644 | Down | 1.37E-06    | GAS8     | 56.355 | 96.746 | 32.8 |
| Q8TC36 | 0.644 | Down | 0.00095723  | SUN5     | 43.081 | 195.69 | 37.7 |
| Q16836 | 0.644 | Down | 3.93E-07    | HADH     | 34.293 | 47.468 | 22.3 |
| O00622 | 0.644 | Down | 0.025755    | CYR61    | 42.026 | 33.467 | 21.5 |
| O75306 | 0.644 | Down | 0.0051961   | NDUFS2   | 52.545 | 26.168 | 15.3 |
| Q8WWB3 | 0.644 | Down | 0.0001567   | DYDC1    | 20.893 | 48.266 | 44.6 |
| Q9UBR2 | 0.644 | Down | 0.0031402   | CTSZ     | 33.868 | 17.141 | 13.9 |
| O14645 | 0.643 | Down | 0.00023841  | DNALI1   | 29.662 | 102.04 | 60.9 |
| O75251 | 0.643 | Down | 9.44E-07    | NDUFS7   | 23.563 | 14.563 | 15.5 |
| Q8TC56 | 0.642 | Down | 2.61E-06    | FAM71B   | 64.755 | 323.31 | 49.1 |
| Q53EV4 | 0.642 | Down | 0.000135901 | LRRC23   | 39.76  | 80.655 | 28.6 |
| O75190 | 0.642 | Down | 0.00060156  | DNAJB6   | 36.087 | 24.633 | 22.7 |
| Q8TC27 | 0.641 | Down | 1.65E-05    | ADAM32   | 87.947 | 274.06 | 20.3 |
| P54709 | 0.64  | Down | 0.000117577 | ATP1B3   | 31.512 | 76.072 | 34.8 |
| Q96M98 | 0.64  | Down | 0.000064184 | PACRG    | 33.341 | 30.791 | 28   |



|        |       |      |             |          |        |        |      |
|--------|-------|------|-------------|----------|--------|--------|------|
| Q96AB3 | 0.64  | Down | 1.56E-05    | ISOC2    | 22.337 | 39.394 | 17.6 |
| Q9BTT6 | 0.64  | Down | 0.0024567   | LRRC1    | 59.241 | 17.206 | 7.3  |
| Q9BQ24 | 0.64  | Down | 0.00130408  | ZFYVE21  | 26.505 | 10.681 | 11.5 |
| A4FU69 | 0.639 | Down | 0.000077062 | EFCAB5   | 173.4  | 55.122 | 11.9 |
| P05060 | 0.639 | Down | 6.96E-07    | CHGB     | 78.275 | 30.998 | 10.5 |
| Q10713 | 0.639 | Down | 0.0047038   | PMPCA    | 58.252 | 24.33  | 10.7 |
| P08571 | 0.639 | Down | 0.00078135  | CD14     | 40.076 | 24.161 | 11.7 |
| P22352 | 0.639 | Down | 0.000101373 | GPX3     | 25.552 | 5.1975 | 8.4  |
| Q8N8K9 | 0.639 | Down | 4.81E-07    | KIAA1958 | 79.211 | 1.735  | 1    |
| Q9UL16 | 0.638 | Down | 2.39E-06    | CFAP45   | 65.729 | 168.45 | 41.2 |
| Q9H0K4 | 0.638 | Down | 0.000103343 | RSPH6A   | 80.912 | 134.99 | 18.4 |
| Q9P2R7 | 0.637 | Down | 0.000117569 | SUCLA2   | 50.317 | 208.98 | 32.8 |
| P00403 | 0.637 | Down | 0.000082769 | MT-CO2   | 25.565 | 55.361 | 30.8 |
| Q13636 | 0.637 | Down | 0.0004766   | RAB31    | 21.569 | 15.224 | 19.6 |
| Q96M91 | 0.636 | Down | 0.000082485 | CFAP53   | 61.834 | 45.483 | 21.6 |
| A1A519 | 0.636 | Down | 0.00044125  | FAM170A  | 37.158 | 180.54 | 43   |
| Q9BXA6 | 0.636 | Down | 1.63E-05    | TSSK6    | 30.331 | 25.98  | 22   |
| A8MV24 | 0.636 | Down | 0.0187376   | C17orf98 | 17.564 | 5.3222 | 18.8 |
| A6NK58 | 0.636 | Down | 0.0060952   | LIPT2    | 25.195 | 15.195 | 9.5  |
| Q5JVL4 | 0.635 | Down | 2.48E-06    | EFHC1    | 73.989 | 171.32 | 38.3 |
| Q75WM6 | 0.635 | Down | 0.000002465 | H1FNT    | 28.116 | 71.978 | 40.4 |
| P48059 | 0.635 | Down | 0.0050018   | LIMS1    | 37.251 | 64.379 | 20   |
| P57737 | 0.635 | Down | 0.032436    | CORO7    | 100.6  | 48.729 | 7.7  |
| Q92688 | 0.635 | Down | 0.00042193  | ANP32B   | 28.787 | 4.759  | 4.4  |
| P33991 | 0.635 | Down | 0.000058914 | MCM4     | 96.557 | 1.9313 | 1    |
| O15230 | 0.634 | Down | 7.60E-07    | LAMA5    | 399.73 | 323.31 | 14.6 |
| P22732 | 0.634 | Down | 0.00068396  | SLC2A5   | 54.973 | 63.933 | 10.4 |
| P05023 | 0.633 | Down | 2.22E-06    | ATP1A1   | 112.89 | 182.29 | 25.8 |
| Q96MR6 | 0.633 | Down | 3.30E-07    | CFAP57   | 144.96 | 85.589 | 23   |
| Q76KD6 | 0.633 | Down | 0.000059981 | SPATC1   | 62.398 | 202.71 | 28.6 |
| Q5H943 | 0.633 | Down | 0.00055598  | CT83     | 12.784 | 17.033 | 20.4 |
| Q86Y39 | 0.633 | Down | 0.000144986 | NDUFA11  | 14.852 | 9.8152 | 18.4 |
| P39210 | 0.633 | Down | 0.00121644  | MPV17    | 19.733 | 3.1678 | 4    |
| Q8WXX5 | 0.632 | Down | 0.00026128  | DNAJC9   | 29.909 | 5.8838 | 13.8 |
| Q8IZ96 | 0.631 | Down | 0.00078281  | CMTM1    | 18.576 | 21.246 | 16.6 |
| Q8NCR6 | 0.63  | Down | 4.28E-06    | SMRP1    | 30.166 | 146.07 | 68.7 |
| P49411 | 0.63  | Down | 4.20E-06    | TUFM     | 49.541 | 92.846 | 36.5 |
| Q9H3U7 | 0.63  | Down | 0.00043655  | SMOC2    | 49.674 | 43.101 | 15.9 |
| O95169 | 0.63  | Down | 0.00023615  | NDUFB8   | 21.766 | 19.79  | 26.3 |
| O95168 | 0.63  | Down | 0.0034208   | NDUFB4   | 15.208 | 53.267 | 23.3 |
| Q06828 | 0.63  | Down | 0.000118345 | FMOD     | 43.178 | 32.236 | 11.7 |
| Q9H6K4 | 0.63  | Down | 0.00096154  | OPA3     | 19.996 | 1.6749 | 5    |
| A6NNW6 | 0.629 | Down | 0.00039814  | ENO4     | 68.82  | 4.1463 | 3.2  |
| Q16891 | 0.627 | Down | 9.91E-07    | IMMT     | 83.677 | 314.72 | 43.8 |
| Q6ZU69 | 0.627 | Down | 0.000020511 | FAM205A  | 148.09 | 183.53 | 15.5 |
| P36542 | 0.627 | Down | 0.00003866  | ATP5F1C  | 32.996 | 74.414 | 26.5 |
| Q8NE09 | 0.627 | Down | 0.000060497 | RGS22    | 147.16 | 45.647 | 10.2 |

|        |       |      |             |          |        |        |      |
|--------|-------|------|-------------|----------|--------|--------|------|
| Q68CQ1 | 0.627 | Down | 0.00007524  | MROH7    | 145.65 | 30.512 | 6    |
| Q9H300 | 0.627 | Down | 0.000160013 | PARL     | 42.19  | 3.9458 | 5.8  |
| Q9UK85 | 0.627 | Down | 0.000039054 | DKKL1    | 27.006 | 8.2675 | 5.4  |
| Q96NL1 | 0.627 | Down | 0.000075996 | TMEM74   | 33.338 | -2     | 2.6  |
| Q13939 | 0.626 | Down | 7.32E-07    | CCIN     | 66.581 | 323.31 | 44.6 |
| P24539 | 0.626 | Down | 0.00000141  | ATP5F1   | 28.908 | 111.7  | 36.7 |
| Q5T124 | 0.626 | Down | 0.000121013 | UBXN11   | 57.373 | 80.296 | 27.7 |
| O95299 | 0.626 | Down | 0.00022301  | NDUFA10  | 40.75  | 37.053 | 18.6 |
| Q8IXA5 | 0.625 | Down | 1.83E-05    | SPACA3   | 23.431 | 191.47 | 40.5 |
| Q8N443 | 0.625 | Down | 4.43E-06    | RIBC1    | 44.014 | 39.145 | 25.9 |
| Q2TAA8 | 0.625 | Down | 0.00092133  | TSNAXIP1 | 76.772 | 52.692 | 10.3 |
| Q9BX68 | 0.625 | Down | 0.00093932  | HINT2    | 17.162 | 25.334 | 24.5 |
| Q5T9A4 | 0.625 | Down | 0.00145886  | ATAD3B   | 72.572 | 19.955 | 6.6  |
| P21333 | 0.624 | Down | 0.00140289  | FLNA     | 280.74 | 53.987 | 9.1  |
| Q494V2 | 0.624 | Down | 0.00043917  | CFAP100  | 71.116 | 31.864 | 13.7 |
| P14927 | 0.623 | Down | 0.000164736 | UQCRB    | 13.53  | 55.43  | 58.6 |
| Q9BXW7 | 0.623 | Down | 0.00163791  | HDHD5    | 46.321 | 16.66  | 10.4 |
| Q9UH99 | 0.623 | Down | 0.00038326  | SUN2     | 80.31  | 30.959 | 7.1  |
| Q53GL7 | 0.623 | Down | 0.00124032  | PARP10   | 110    | 9.4073 | 4.4  |
| Q96LP2 | 0.623 | Down | 0.0057953   | FAM81B   | 52.032 | 20.205 | 6.2  |
| P27482 | 0.622 | Down | 0.00042291  | CALML3   | 16.891 | 30.248 | 27.5 |
| Q8TF09 | 0.622 | Down | 0.000042366 | DYNLRB2  | 10.855 | 26.049 | 29.2 |
| O75521 | 0.621 | Down | 0.00012225  | ECI2     | 43.585 | 187.1  | 36   |
| Q99985 | 0.621 | Down | 4.01E-06    | SEMA3C   | 85.206 | 26.463 | 15.6 |
| Q9Y581 | 0.621 | Down | 0.00090416  | INSL6    | 24.859 | 8.6385 | 9.9  |
| Q92667 | 0.62  | Down | 0.0092354   | AKAP1    | 97.34  | 5.9623 | 3.3  |
| P12236 | 0.619 | Down | 0.000143142 | SLC25A6  | 32.866 | 24.558 | 36.9 |
| Q9UJS0 | 0.619 | Down | 0.000036039 | SLC25A13 | 74.175 | 53.131 | 15.6 |
| Q16795 | 0.619 | Down | 0.0160366   | NDUFA9   | 42.509 | 23.351 | 20.7 |
| Q86SX6 | 0.619 | Down | 0.00092405  | GLRX5    | 16.628 | 49.901 | 33.1 |
| Q96B49 | 0.619 | Down | 0.012342    | TOMM6    | 8.0019 | 9.6379 | 18.9 |
| Q5VTU8 | 0.618 | Down | 0.00057974  | ATP5EP2  | 5.8068 | 4.1143 | 45.1 |
| P07339 | 0.617 | Down | 3.80E-06    | CTSD     | 44.552 | 72.694 | 35.4 |
| O75955 | 0.617 | Down | 0.00032025  | FLOT1    | 47.355 | 144.61 | 35.1 |
| Q5T681 | 0.617 | Down | 0.000158858 | C10orf62 | 25.128 | 25.928 | 18.4 |
| Q9H1K1 | 0.617 | Down | 0.0020005   | ISCU     | 17.999 | 10.39  | 20.4 |
| Q5VZ52 | 0.617 | Down | 0.0033237   | MORN5    | 18.731 | 18.709 | 14.9 |
| Q8NA47 | 0.616 | Down | 1.52E-05    | CCDC63   | 66.25  | 90.165 | 30.2 |
| Q9NVV0 | 0.616 | Down | 0.00175607  | TMEM38B  | 32.509 | 12.004 | 8.2  |
| P24311 | 0.616 | Down | 0.000120544 | COX7B    | 9.1604 | 2.5589 | 10   |
| Q9UIF3 | 0.615 | Down | 0.000020827 | TEKT2    | 49.672 | 307.52 | 45.6 |
| Q96QH8 | 0.615 | Down | 0.000039716 | SPACA5   | 17.896 | 22.857 | 27   |
| Q6J272 | 0.614 | Down | 0.000075546 | FAM166A  | 36.165 | 181.64 | 60.3 |
| P26440 | 0.614 | Down | 0.000103877 | IVD      | 46.319 | 34.805 | 21.7 |
| P07948 | 0.614 | Down | 0.0050978   | LYN      | 58.573 | 15.793 | 10.9 |
| O60423 | 0.614 | Down | 0.0132785   | ATP8B3   | 146.75 | 14.132 | 2.2  |
| Q8WW14 | 0.613 | Down | 3.21E-06    | C10orf82 | 26.343 | 123.09 | 54.3 |

|            |       |      |             |           |        |        |      |
|------------|-------|------|-------------|-----------|--------|--------|------|
| Q9UF47     | 0.613 | Down | 0.00089627  | DNAJC5B   | 22.496 | 8.0551 | 7.5  |
| Q9UKX7     | 0.613 | Down | 0.00073661  | NUP50     | 50.144 | 8.3972 | 5.3  |
| P15291     | 0.612 | Down | 0.0022614   | B4GALT1   | 43.92  | 72.463 | 17.6 |
| Q9BRQ6     | 0.612 | Down | 9.17E-07    | CHCHD6    | 26.457 | 20.823 | 19.1 |
| Q9BPW8     | 0.612 | Down | 0.00130311  | NIPSNAP1  | 33.31  | 41.948 | 12.7 |
| P19404     | 0.611 | Down | 0.00034263  | NDUFV2    | 27.391 | 91.757 | 39.8 |
| Q9Y305     | 0.611 | Down | 0.021044    | ACOT9     | 49.901 | 16.179 | 12.5 |
| P43897     | 0.61  | Down | 0.00063999  | TSFM      | 35.39  | 31.8   | 20   |
| Q8WY22     | 0.61  | Down | 0.00108338  | BRI3BP    | 27.835 | 64.604 | 9.2  |
| P02647     | 0.609 | Down | 0.000124252 | APOA1     | 30.777 | 108.85 | 50.2 |
| Q5TH74     | 0.609 | Down | 0.0022954   | STPG1     | 36.786 | 16.151 | 9.3  |
| O96000     | 0.608 | Down | 4.40E-06    | NDUFB10   | 20.776 | 58.939 | 33.7 |
| Q5EBM0     | 0.608 | Down | 0.000075123 | CMPK2     | 49.447 | 25.032 | 15.1 |
| Q9HBL7     | 0.608 | Down | 0.000075321 | PLGRKT    | 17.201 | 8.6656 | 8.8  |
| Q92485     | 0.607 | Down | 0.024859    | SMPDL3B   | 50.813 | 35.313 | 12.7 |
| Q5THR3     | 0.606 | Down | 0.000015262 | EFCAB6    | 172.93 | 217.74 | 25.4 |
| Q96PU9     | 0.606 | Down | 0.00030315  | ODF3      | 27.71  | 115.6  | 56.7 |
| P02649     | 0.606 | Down | 0.000058823 | APOE      | 36.154 | 134.53 | 39.7 |
| Q8N7B9     | 0.606 | Down | 0.000024966 | EFCAB3    | 50.146 | 65.976 | 18.7 |
| Q96EY8     | 0.606 | Down | 0.00031684  | MMAB      | 27.388 | 58.202 | 26.4 |
| O00468     | 0.605 | Down | 0.000055436 | AGRN      | 217.23 | 323.31 | 31.9 |
| Q6ZQQ2     | 0.605 | Down | 1.95E-05    | SPATA31D1 | 175.62 | 66.522 | 12.8 |
| P14406     | 0.605 | Down | 0.00064031  | COX7A2    | 9.3959 | 7.6035 | 27.7 |
| Q8IZ07     | 0.605 | Down | 0.0027047   | ANKRD13A  | 67.618 | 2.2352 | 2    |
| Q96MC2     | 0.604 | Down | 4.64E-06    | DRC1      | 87.133 | 34.65  | 16.6 |
| Q96E40     | 0.604 | Down | 0.00047525  | SPACA9    | 25.166 | 125.56 | 27.5 |
| Q6NUK1     | 0.604 | Down | 0.00005904  | SLC25A24  | 53.354 | 20.81  | 15.9 |
| A0A1B0GU33 | 0.604 | Down | 0.000097649 | TEX53     | 8.1274 | 3.209  | 11.4 |
| Q9BUN1     | 0.603 | Down | 1.73E-05    | MENT      | 36.769 | 323.31 | 60.4 |
| Q9HBV2     | 0.603 | Down | 0.000095684 | SPACA1    | 32.143 | 323.31 | 49   |
| P48047     | 0.603 | Down | 1.57E-05    | ATP5O     | 23.277 | 96.65  | 48.8 |
| Q9Y4W6     | 0.603 | Down | 0.000020093 | AFG3L2    | 88.583 | 41.886 | 17.4 |
| Q13733     | 0.602 | Down | 2.11E-06    | ATP1A4    | 114.17 | 323.31 | 29.6 |
| P21912     | 0.602 | Down | 0.00009769  | SDHB      | 31.629 | 84.712 | 41.4 |
| P50213     | 0.602 | Down | 0.00091625  | IDH3A     | 39.591 | 35.627 | 24.9 |
| Q02978     | 0.602 | Down | 0.00024492  | SLC25A11  | 34.061 | 51.672 | 23.2 |
| P22570     | 0.602 | Down | 0.0028836   | FDXR      | 53.836 | 28.317 | 15.3 |
| Q8WW43     | 0.602 | Down | 0.000059274 | APH1B     | 28.46  | 2.4456 | 4.7  |
| P43155     | 0.601 | Down | 0.00034296  | CRAT      | 70.857 | 74.528 | 28.6 |
| A0A1B0GUW6 | 0.6   | Down | 9.96E-07    | SPEM3     | 128.65 | 323.31 | 31.8 |
| Q5TCS8     | 0.6   | Down | 0.00029963  | AK9       | 221.41 | 16.859 | 5.4  |
| Q9HC21     | 0.599 | Down | 1.66E-06    | SLC25A19  | 35.511 | 60.395 | 35   |
| P13073     | 0.598 | Down | 7.50E-07    | COX4I1    | 19.576 | 79.337 | 43.8 |
| Q5JX69     | 0.598 | Down | 0.000024144 | FAM209B   | 19.498 | 60.848 | 55   |
| Q9BQ16     | 0.598 | Down | 0.0048434   | SPOCK3    | 49.428 | 70.413 | 20.2 |
| O75390     | 0.597 | Down | 0.000024904 | CS        | 51.712 | 104.99 | 27.7 |
| Q08830     | 0.597 | Down | 0.000140092 | FGL1      | 36.379 | 26.118 | 14.7 |

|        |       |      |             |           |        |        |      |
|--------|-------|------|-------------|-----------|--------|--------|------|
| Q969V4 | 0.595 | Down | 1.63E-05    | TEKT1     | 48.283 | 62.019 | 40.4 |
| P42765 | 0.595 | Down | 0.00112488  | ACAA2     | 41.924 | 234.63 | 43.1 |
| Q9Y6A4 | 0.595 | Down | 1.54E-05    | CFAP20    | 22.774 | 26.084 | 25.4 |
| Q5KU26 | 0.595 | Down | 0.000099508 | COLEC12   | 81.514 | 15.357 | 4    |
| H3BRN8 | 0.595 | Down | 0.0056214   | C15orf65  | 13.763 | 14.039 | 23.1 |
| P23786 | 0.594 | Down | 3.35E-06    | CPT2      | 73.776 | 245.52 | 38.9 |
| Q13423 | 0.594 | Down | 0.0057355   | NNT       | 113.89 | 22.739 | 10.5 |
| Q96SK2 | 0.594 | Down | 0.000063226 | TMEM209   | 62.921 | 108.61 | 13.7 |
| Q96RQ3 | 0.594 | Down | 0.0097786   | MCCC1     | 80.472 | 34.214 | 6.9  |
| Q06190 | 0.594 | Down | 0.00050161  | PPP2R3A   | 130.28 | -2     | 1    |
| O00330 | 0.593 | Down | 0.000023381 | PDHX      | 54.122 | 144.46 | 33.1 |
| P04233 | 0.593 | Down | 0.00058029  | CD74      | 33.515 | 10.771 | 7.8  |
| Q9H0C2 | 0.592 | Down | 1.91E-05    | SLC25A31  | 35.021 | 69.707 | 47.6 |
| O75604 | 0.592 | Down | 0.000075421 | USP2      | 68.071 | 15.662 | 9.6  |
| Q5I0G3 | 0.591 | Down | 0.000040791 | MDH1B     | 58.65  | 8.1925 | 6.6  |
| P61604 | 0.59  | Down | 4.13E-06    | HSPE1     | 10.932 | 43.582 | 78.4 |
| O75323 | 0.59  | Down | 0.000196623 | NIPSNAP2  | 33.742 | 29.921 | 13.3 |
| Q6S8J3 | 0.589 | Down | 0.00049565  | POTEE     | 121.36 | -2     | 8.5  |
| Q9H4K1 | 0.588 | Down | 4.68E-07    | RIBC2     | 37.059 | 71.267 | 37.5 |
| Q96M95 | 0.588 | Down | 1.77E-07    | CCDC42    | 38.019 | 76.35  | 31   |
| Q9H4Y5 | 0.588 | Down | 0.000096077 | GSTO2     | 28.254 | 21.741 | 20.2 |
| Q5VTH9 | 0.588 | Down | 0.000099507 | WDR78     | 94.572 | 20.86  | 7.5  |
| P36957 | 0.587 | Down | 0.000116787 | DLST      | 48.755 | 88.114 | 19   |
| P20674 | 0.587 | Down | 0.00069823  | COX5A     | 16.762 | 37.717 | 38   |
| Q9H1X1 | 0.587 | Down | 0.0041228   | RSPH9     | 31.291 | 65.344 | 25   |
| Q5VU69 | 0.586 | Down | 0.0002414   | C1orf189  | 12.131 | 21.315 | 43.6 |
| Q9C005 | 0.586 | Down | 0.000099363 | DPY30     | 11.25  | 5.9937 | 18.2 |
| Q6ZUB1 | 0.585 | Down | 0.000023275 | SPATA31E1 | 157.13 | 135.78 | 19.9 |
| Q8TCU4 | 0.585 | Down | 0.00010387  | ALMS1     | 461.06 | 34.495 | 2.4  |
| Q495T6 | 0.585 | Down | 0.00110325  | MMEL1     | 89.366 | 17.158 | 6.5  |
| Q9UKF5 | 0.585 | Down | 0.000022298 | ADAM29    | 92.758 | 66.408 | 7.9  |
| Q16740 | 0.585 | Down | 0.0064447   | CLPP      | 30.18  | 13.74  | 18.1 |
| Q8WWF5 | 0.584 | Down | 0.000021073 | ZNRF4     | 46.958 | 10.383 | 8.6  |
| Q07955 | 0.583 | Down | 0.00118082  | SRSF1     | 27.744 | 17.135 | 23   |
| P01834 | 0.582 | Down | 0.008399    | IGKC      | 11.765 | 112.36 | 48.6 |
| Q96QE4 | 0.581 | Down | 0.00025545  | LRRC37B   | 105.57 | 323.31 | 28.3 |
| Q15506 | 0.581 | Down | 0.00020106  | SPA17     | 17.406 | 121.94 | 68.9 |
| Q8IYX3 | 0.581 | Down | 0.00018248  | CCDC116   | 56.939 | 18.77  | 10.1 |
| Q8NDM7 | 0.58  | Down | 1.77E-05    | CFAP43    | 191.98 | 55.65  | 13.1 |
| P19367 | 0.579 | Down | 2.43E-06    | HK1       | 102.48 | 323.31 | 44.8 |
| P35232 | 0.579 | Down | 0.000040064 | PHB       | 29.804 | 123.42 | 44.1 |
| Q16629 | 0.579 | Down | 0.000161139 | SRSF7     | 27.366 | 55.013 | 26.5 |
| O75071 | 0.579 | Down | 0.00075999  | EFCAB14   | 55.031 | 20.431 | 9.1  |
| Q9HC84 | 0.578 | Down | 1.92E-05    | MUC5B     | 596.33 | 323.31 | 8.4  |
| Q96RQ9 | 0.578 | Down | 0.000037798 | IL4I1     | 62.88  | 109.99 | 27.9 |
| P59910 | 0.578 | Down | 1.98E-05    | DNAJB13   | 36.118 | 110.77 | 40.8 |
| Q96IX5 | 0.578 | Down | 0.0002356   | USMG5     | 6.4575 | 48.89  | 44.8 |

|        |       |      |             |          |        |        |      |
|--------|-------|------|-------------|----------|--------|--------|------|
| Q9H0J4 | 0.577 | Down | 0.000036467 | QRICH2   | 180.82 | 195.67 | 13   |
| Q8TBZ2 | 0.577 | Down | 0.00135743  | MYCBPAP  | 108.15 | 11.971 | 3.6  |
| Q8TC29 | 0.575 | Down | 3.02E-06    | ENKUR    | 29.454 | 63.125 | 46.1 |
| Q9NRY7 | 0.575 | Down | 0.0023188   | PLSCR2   | 33.503 | 15.228 | 5.1  |
| P55795 | 0.574 | Down | 1.65E-05    | HNRNPH2  | 49.263 | 16.704 | 14.3 |
| Q9NT22 | 0.574 | Down | 0.0001587   | EMILIN3  | 82.646 | 17.08  | 5.7  |
| Q8N3J2 | 0.574 | Down | 0.000120861 | METTL4   | 54.041 | -2     | 1.7  |
| Q8IYE0 | 0.573 | Down | 4.77E-06    | CCDC146  | 112.81 | 24.763 | 9.3  |
| A6NJV1 | 0.573 | Down | 0.000062873 | C2orf70  | 23.421 | 43.618 | 22.4 |
| O75431 | 0.573 | Down | 0.00033777  | MTX2     | 29.763 | 22.923 | 20.5 |
| P30049 | 0.573 | Down | 0.000119824 | ATP5F1D  | 17.49  | 142.35 | 13.7 |
| Q8NHU2 | 0.573 | Down | 0.0024005   | CFAP61   | 141.35 | 9.8665 | 4.6  |
| Q9Y639 | 0.573 | Down | 0.00033844  | NPTN     | 44.387 | 10.732 | 6    |
| Q99798 | 0.572 | Down | 2.78E-06    | ACO2     | 85.424 | 323.31 | 38.1 |
| Q6UW49 | 0.572 | Down | 0.000098301 | SPESP1   | 38.931 | 323.31 | 42.3 |
| Q5T2S8 | 0.572 | Down | 8.67E-07    | ARMC4    | 115.68 | 173.79 | 20.2 |
| P10809 | 0.571 | Down | 1.88E-05    | HSPD1    | 61.054 | 323.31 | 49.4 |
| Q9BS86 | 0.571 | Down | 0.000042726 | ZBPB     | 40.141 | 184.91 | 37.9 |
| Q5JTV8 | 0.571 | Down | 0.00048253  | TOR1AIP1 | 66.248 | 66.671 | 20.6 |
| Q9UKR8 | 0.571 | Down | 0.00131965  | TSPAN16  | 26.265 | 26.308 | 15.5 |
| Q0VAA2 | 0.571 | Down | 0.000081533 | LRRC74A  | 54.534 | 3.742  | 3.7  |
| Q15942 | 0.571 | Down | 0.000158906 | ZYX      | 61.277 | 6.8138 | 4.7  |
| Q96JB1 | 0.57  | Down | 3.94E-06    | DNAH8    | 514.66 | 323.31 | 23   |
| Q8TDY3 | 0.57  | Down | 0.000004143 | ACTRT2   | 41.701 | 100.29 | 30   |
| P30740 | 0.57  | Down | 0.00045638  | SERPINB1 | 42.741 | 30.45  | 20.1 |
| O75400 | 0.57  | Down | 4.00E-08    | PRPF40A  | 108.8  | 3.3086 | 2.6  |
| O00217 | 0.569 | Down | 0.000100841 | NDUFS8   | 23.705 | 26.701 | 30.5 |
| Q5BN46 | 0.569 | Down | 0.00054024  | C9orf116 | 15.26  | 20.449 | 28.7 |
| Q9UFH2 | 0.568 | Down | 1.62E-06    | DNAH17   | 511.78 | 323.31 | 27.2 |
| Q0VFZ6 | 0.568 | Down | 1.39E-06    | CCDC173  | 66.402 | 134.41 | 37.5 |
| Q5VZ72 | 0.568 | Down | 0.000036492 | IZUMO3   | 27.768 | 12.347 | 19.2 |
| O75594 | 0.568 | Down | 0.00073919  | PGLYRP1  | 21.731 | 37.921 | 12.2 |
| Q53QW1 | 0.568 | Down | 0.0036782   | TEX44    | 41.589 | 6.3507 | 4.3  |
| O14548 | 0.568 | Down | 0.0020617   | COX7A2L  | 12.615 | 8.2165 | 11.4 |
| Q8NEH6 | 0.567 | Down | 0.000103542 | MNS1     | 60.571 | 104.34 | 37.2 |
| Q14093 | 0.567 | Down | 2.11E-08    | CYLC2    | 39.078 | 139.69 | 31.9 |
| Q5TEZ5 | 0.566 | Down | 0.000020124 | C6orf163 | 38.553 | 43.131 | 31.6 |
| Q4LDG9 | 0.566 | Down | 0.000020172 | DNAL1    | 21.533 | 46.868 | 41.1 |
| P02774 | 0.566 | Down | 0.000160682 | GC       | 52.963 | 157.08 | 21.1 |
| O43181 | 0.566 | Down | 1.80E-05    | NDUFS4   | 20.108 | 2.5723 | 5.1  |
| Q9UII2 | 0.565 | Down | 0.000020293 | ATPIF1   | 12.249 | 19.666 | 41.5 |
| Q96LM6 | 0.564 | Down | 0.000160235 | TEX37    | 20.614 | 22.358 | 32.8 |
| Q8WW24 | 0.563 | Down | 2.48E-06    | TEKT4    | 50.648 | 323.31 | 59.1 |
| P58340 | 0.563 | Down | 0.00074434  | MLF1     | 30.627 | 77.747 | 41.8 |
| Q9C002 | 0.563 | Down | 0.00020411  | NMES1    | 9.6172 | 15.563 | 27.7 |
| P30084 | 0.562 | Down | 0.00032171  | ECHS1    | 31.387 | 94.375 | 25.5 |
| Q9H0B3 | 0.561 | Down | 1.80E-06    | IQCN     | 127.69 | 323.31 | 52.2 |

|            |       |      |             |           |        |        |      |
|------------|-------|------|-------------|-----------|--------|--------|------|
| O75489     | 0.561 | Down | 0.00128437  | NDUFS3    | 30.241 | 45.793 | 37.1 |
| Q8N4L4     | 0.56  | Down | 0.00120258  | SPEM1     | 34.773 | 90.558 | 23.6 |
| Q6P4A8     | 0.56  | Down | 0.000138365 | PLBD1     | 63.254 | 8.0269 | 7.1  |
| O95167     | 0.56  | Down | 0.0000395   | NDUFA3    | 9.2787 | 46.549 | 50   |
| Q9H9A6     | 0.559 | Down | 0.000097262 | LRRC40    | 68.249 | 10.247 | 9    |
| Q8IYV9     | 0.557 | Down | 0.00158257  | IZUMO1    | 38.93  | 15.734 | 13.7 |
| P04179     | 0.555 | Down | 2.39E-06    | SOD2      | 24.75  | 64.783 | 31.1 |
| O75923     | 0.555 | Down | 0.00101937  | DYSF      | 237.29 | 21.28  | 3.5  |
| Q9NQ60     | 0.554 | Down | 0.00047837  | EQTN      | 32.839 | 233.39 | 21.4 |
| Q6TDU7     | 0.554 | Down | 0.0054422   | CASC1     | 83.159 | 50.053 | 10.6 |
| Q12798     | 0.554 | Down | 0.000022931 | CETN1     | 19.57  | 10.593 | 14.5 |
| Q8TE73     | 0.553 | Down | 0.000178303 | DNAH5     | 529.01 | 2.8356 | 2.1  |
| Q9UKV3     | 0.553 | Down | 0.0171026   | ACIN1     | 151.86 | 12.618 | 2.1  |
| Q96KX0     | 0.551 | Down | 0.000001482 | LYZL4     | 16.433 | 89.663 | 53.4 |
| Q5T5A4     | 0.551 | Down | 1.59E-05    | C1orf194  | 19.349 | 93.609 | 47.3 |
| Q5JRM2     | 0.551 | Down | 0.00063614  | CXorf66   | 39.943 | 41.887 | 23.5 |
| Q6ZUB0     | 0.55  | Down | 0.000024516 | SPATA31D4 | 102.3  | 75.048 | 18.3 |
| P14854     | 0.55  | Down | 3.17E-06    | COX6B1    | 10.192 | 64.156 | 75.6 |
| Q9H5F2     | 0.55  | Down | 0.0061635   | C11orf1   | 17.785 | 30.738 | 31.3 |
| Q9NRG7     | 0.55  | Down | 2.03E-06    | SDR39U1   | 34.747 | 8.6419 | 10.7 |
| Q5T871     | 0.549 | Down | 0.000075465 | LELP1     | 10.697 | 30.286 | 45.9 |
| Q5T5S1     | 0.548 | Down | 0.000120361 | CCDC183   | 62.689 | 46.709 | 27.3 |
| Q9Y615     | 0.548 | Down | 0.00033779  | ACTL7A    | 48.643 | 89.437 | 35.6 |
| O43837     | 0.548 | Down | 0.000163118 | IDH3B     | 42.183 | 76.313 | 21   |
| Q5VUJ9     | 0.548 | Down | 0.00054043  | EFCAB2    | 29.713 | 1.7488 | 3.3  |
| P10323     | 0.546 | Down | 1.82E-05    | ACR       | 45.846 | 258.67 | 31.6 |
| P26436     | 0.546 | Down | 0.000117713 | ACRV1     | 28.156 | 52.972 | 14.3 |
| Q8NA69     | 0.546 | Down | 0.0049806   | TEX45     | 57.33  | 13.348 | 16.4 |
| P13284     | 0.546 | Down | 0.0075248   | IFI30     | 27.963 | -2     | 4.4  |
| O75356     | 0.545 | Down | 0.00043551  | ENTPD5    | 47.517 | 25.786 | 6.3  |
| Q96NG3     | 0.544 | Down | 1.59E-05    | TTC25     | 76.654 | 291.03 | 33.2 |
| P07919     | 0.544 | Down | 0.00009973  | UQCRH     | 10.739 | 58.685 | 61.5 |
| O75964     | 0.542 | Down | 0.0021965   | ATP5L     | 11.428 | 9.4634 | 23.3 |
| Q13421     | 0.541 | Down | 0.0031816   | MSLN      | 68.985 | 38.109 | 14   |
| P0DOX5     | 0.541 | Down | 0.00117908  | ---       | 48.986 | 14.21  | 13.4 |
| P00450     | 0.541 | Down | 0.00066464  | CP        | 122.2  | 15.552 | 6.3  |
| A0A0B4J2F0 | 0.54  | Down | 1.54E-05    | PIGBOS1   | 6.3133 | 3.7919 | 18.5 |
| A7E2U8     | 0.539 | Down | 2.11E-06    | C4orf47   | 34.376 | 77.307 | 32   |
| P35663     | 0.538 | Down | 2.92E-07    | CYLC1     | 74.241 | 163.49 | 25.5 |
| Q96M32     | 0.538 | Down | 0.000021355 | AK7       | 82.657 | 8.438  | 4.7  |
| P30405     | 0.537 | Down | 1.90E-05    | PPIF      | 22.04  | 7.3452 | 23.7 |
| Q9NY87     | 0.536 | Down | 0.000104428 | SPANXC    | 10.982 | 172.5  | 64.9 |
| Q8TDL5     | 0.536 | Down | 0.00031758  | BPIFB1    | 52.441 | 39.639 | 14.3 |
| P26583     | 0.536 | Down | 4.89E-06    | HMGB2     | 24.033 | 19.602 | 17.7 |
| P02654     | 0.536 | Down | 0.0002831   | APOC1     | 9.3318 | 3.7221 | 21.7 |
| Q16698     | 0.535 | Down | 0.000020087 | DECR1     | 36.067 | 239.13 | 40.6 |
| O75951     | 0.535 | Down | 0.0040418   | LYZL6     | 16.956 | 79.969 | 25   |

|        |       |      |             |           |        |        |      |
|--------|-------|------|-------------|-----------|--------|--------|------|
| Q8TAQ9 | 0.533 | Down | 0.000198125 | SUN3      | 40.503 | 54.759 | 19.3 |
| Q8N456 | 0.533 | Down | 0.00143871  | LRRC18    | 29.737 | 9.2049 | 11.5 |
| P09466 | 0.532 | Down | 0.000043429 | PAEP      | 20.624 | 22.211 | 22.2 |
| Q14156 | 0.532 | Down | 0.000022887 | EFR3A     | 92.923 | 62.938 | 7.4  |
| Q6ZVS7 | 0.532 | Down | 0.000064214 | FAM183BP  | 16.193 | 15.616 | 17.8 |
| Q8N7U6 | 0.531 | Down | 2.61E-06    | EFHB      | 93.801 | 149.77 | 19.6 |
| Q8TC94 | 0.531 | Down | 9.42E-07    | ACTL9     | 45.627 | 178.45 | 38.9 |
| Q16718 | 0.531 | Down | 0.000057707 | NDUFA5    | 13.459 | 37.772 | 44   |
| Q08477 | 0.53  | Down | 0.0095413   | CYP4F3    | 59.846 | 14.334 | 10.4 |
| Q8IYK2 | 0.527 | Down | 4.33E-06    | CCDC105   | 56.908 | 111.02 | 40.7 |
| P10606 | 0.527 | Down | 1.92E-05    | COX5B     | 13.696 | 46.977 | 51.2 |
| Q3ZCV2 | 0.527 | Down | 0.000038529 | LEXM      | 47.583 | 9.745  | 9.1  |
| O95631 | 0.527 | Down | 0.00057855  | NTN1      | 67.748 | 18.259 | 7.6  |
| P01833 | 0.526 | Down | 1.12E-06    | PIGR      | 83.283 | 31.903 | 10.9 |
| Q6URK8 | 0.525 | Down | 0.000021414 | TEPP      | 30.717 | 38.633 | 48.7 |
| Q8N865 | 0.525 | Down | 0.000056444 | C7orf31   | 68.464 | 104.79 | 26.6 |
| P43405 | 0.525 | Down | 0.000141471 | SYK       | 72.065 | 41.379 | 11.2 |
| Q9UI09 | 0.525 | Down | 9.21E-07    | NDUFA12   | 17.114 | 47.789 | 50.3 |
| Q53TS8 | 0.524 | Down | 0.002201    | C2CD6     | 71.158 | 4.3408 | 3.2  |
| Q6NXR0 | 0.523 | Down | 4.58E-07    | IRGC      | 50.288 | 159.71 | 32.4 |
| A6NCJ1 | 0.523 | Down | 0.0027355   | C19orf71  | 24.176 | 45.841 | 41.1 |
| O43247 | 0.521 | Down | 0.000044621 | TEX33     | 30.724 | 22.859 | 27.5 |
| Q8NEB7 | 0.52  | Down | 1.05E-06    | ACRBP     | 61.358 | 296.81 | 40.3 |
| Q99417 | 0.519 | Down | 0.000160452 | MYCBP     | 11.967 | 37.444 | 54.4 |
| Q6Q759 | 0.517 | Down | 1.84E-05    | SPAG17    | 251.74 | 68.101 | 6.3  |
| O43920 | 0.517 | Down | 1.77E-05    | NDUFS5    | 12.517 | 10.823 | 44.3 |
| O75947 | 0.516 | Down | 0.00053955  | ATP5H     | 18.491 | 26.508 | 57.8 |
| O14949 | 0.516 | Down | 1.69E-05    | UQCRQ     | 9.9062 | 12.973 | 51.2 |
| Q6P656 | 0.516 | Down | 0.000019806 | CFAP161   | 34.294 | 49.248 | 22.3 |
| P02749 | 0.516 | Down | 0.00062291  | APOH      | 38.298 | 108.81 | 11   |
| P0DKB6 | 0.516 | Down | 0.0064998   | MPC1L     | 15.137 | 24.561 | 25   |
| Q8N1D5 | 0.515 | Down | 0.000040897 | C1orf158  | 23.067 | 29.039 | 34   |
| Q15233 | 0.514 | Down | 0.000023505 | NONO      | 54.231 | 11.292 | 10.4 |
| O75746 | 0.513 | Down | 4.96E-06    | SLC25A12  | 74.761 | 36.316 | 14.9 |
| O96015 | 0.513 | Down | 0.000038073 | DNAL4     | 12.009 | 4.1878 | 17.1 |
| P21741 | 0.512 | Down | 4.31E-06    | MDK       | 15.585 | 196.95 | 55.2 |
| P09669 | 0.512 | Down | 1.82E-07    | COX6C     | 8.7813 | 22.399 | 50.7 |
| Q8NEA5 | 0.512 | Down | 0.0127396   | C19orf18  | 24.151 | 13.227 | 9.3  |
| Q9Y2R0 | 0.512 | Down | 1.79E-05    | COA3      | 11.731 | 5.313  | 26.4 |
| P04004 | 0.511 | Down | 0.00103898  | VTN       | 54.305 | 54.37  | 15.1 |
| Q6ZN84 | 0.511 | Down | 0.000199789 | CCDC81    | 76.083 | 31.972 | 16.7 |
| Q9Y6N5 | 0.51  | Down | 0.000143578 | SQOR      | 49.96  | 37.709 | 21.1 |
| P01008 | 0.508 | Down | 0.000024894 | SERPINC1  | 52.602 | 18.19  | 9.3  |
| P47985 | 0.507 | Down | 9.20E-07    | UQCRFS1   | 29.668 | 77.389 | 21.5 |
| Q8WTU0 | 0.507 | Down | 0.00167728  | DDI1      | 44.124 | 18.975 | 16.9 |
| Q8N6K0 | 0.506 | Down | 0.000141544 | TEX29     | 16.649 | 2.8505 | 8.6  |
| Q58FG1 | 0.504 | Down | 0.000077486 | HSP90AA4P | 47.711 | 15.964 | 8.9  |

|        |       |      |             |         |        |        |      |
|--------|-------|------|-------------|---------|--------|--------|------|
| P05186 | 0.504 | Down | 1.58E-05    | ALPL    | 57.304 | 27.781 | 13.2 |
| Q9NS26 | 0.503 | Down | 3.56E-07    | SPANXA1 | 11.038 | 68.269 | 64.9 |
| Q00059 | 0.502 | Down | 0.000040675 | TFAM    | 29.096 | 59.473 | 39   |
| Q8TDB8 | 0.501 | Down | 2.95E-06    | SLC2A14 | 56.319 | 30.658 | 13.7 |
| Q2KJY2 | 0.501 | Down | 1.82E-05    | KIF26B  | 223.88 | 3.381  | 0.7  |
| Q9HAE3 | 0.498 | Down | 0.0039963   | EFCAB1  | 24.488 | 9.8836 | 14.2 |
| Q12846 | 0.498 | Down | 0.000079162 | STX4    | 34.18  | 30.874 | 6.4  |
| P28799 | 0.497 | Down | 0.000023855 | GRN     | 63.544 | 8.8772 | 6.6  |
| O75764 | 0.497 | Down | 0.0025755   | TCEA3   | 38.971 | -2     | 2    |
| P82909 | 0.496 | Down | 0.000021768 | MRPS36  | 11.466 | 21.419 | 41.7 |
| Q5T1C6 | 0.496 | Down | 0.000035068 | THEM4   | 27.129 | 20.816 | 16.7 |
| Q9UIK5 | 0.493 | Down | 0.00003542  | TMEFF2  | 41.428 | 11.075 | 7.8  |
| Q9GZS0 | 0.491 | Down | 1.26E-06    | DNAI2   | 68.821 | 36.864 | 13.2 |
| P48730 | 0.488 | Down | 0.0038631   | CSNK1D  | 47.33  | 3.7151 | 6.3  |
| Q99988 | 0.488 | Down | 0.000135401 | GDF15   | 34.14  | 49.577 | 9.7  |
| Q5T0N1 | 0.486 | Down | 0.000058729 | CFAP70  | 125.72 | 7.9484 | 4.9  |
| Q7Z4W2 | 0.485 | Down | 0.0038359   | LYZL2   | 16.656 | 86.566 | 26.4 |
| Q6V702 | 0.485 | Down | 0.000122362 | C4orf22 | 26.869 | 30.557 | 17.2 |
| P42167 | 0.485 | Down | 0.00021735  | TMPO    | 50.67  | 76.781 | 14.5 |
| Q9Y6M9 | 0.485 | Down | 0.0002825   | NDUFB9  | 21.831 | 6.4789 | 14.5 |
| Q8WW32 | 0.484 | Down | 1.97E-05    | HMGB4   | 22.49  | 39.297 | 34.9 |
| P00747 | 0.484 | Down | 0.00023946  | PLG     | 90.568 | 65.476 | 12   |
| P0DJG4 | 0.483 | Down | 0.000079629 | THEGL   | 53.028 | 2.1004 | 1.7  |
| P05141 | 0.482 | Down | 0.000056036 | SLC25A5 | 32.852 | 50.4   | 37.2 |
| Q7Z5V6 | 0.482 | Down | 7.99E-07    | PPP1R32 | 47.294 | 167.41 | 26.8 |
| Q9BXF9 | 0.48  | Down | 2.19E-06    | TEKT3   | 56.635 | 216.01 | 55.7 |
| Q9UI46 | 0.48  | Down | 1.63E-05    | DNAI1   | 79.282 | 210.07 | 25.9 |
| Q5CZC0 | 0.479 | Down | 2.88E-07    | FSIP2   | 780.6  | 323.31 | 13.2 |
| Q96HE7 | 0.479 | Down | 0.00002102  | ERO1A   | 54.392 | 19.996 | 16.5 |
| Q9BPU6 | 0.479 | Down | 0.000058212 | DPYSL5  | 61.421 | 1.7417 | 1.2  |
| P01024 | 0.478 | Down | 0.0022973   | C3      | 187.15 | 100.03 | 10.5 |
| Q8IXM7 | 0.478 | Down | 4.69E-06    | ODF3L1  | 31.065 | 73.368 | 25.9 |
| Q9Y3E0 | 0.477 | Down | 3.60E-06    | GOLT1B  | 15.425 | 2.9156 | 9.4  |
| P00751 | 0.474 | Down | 3.86E-06    | CFB     | 85.532 | 34.533 | 13.1 |
| A4D263 | 0.472 | Down | 1.55E-05    | SPATA48 | 49.672 | 31.103 | 15.5 |
| Q86UB9 | 0.472 | Down | 0.00061586  | TMEM135 | 52.29  | 3.6416 | 4.8  |
| P42858 | 0.471 | Down | 1.07E-06    | HTT     | 347.6  | 6.8405 | 1.6  |
| P84103 | 0.471 | Down | 0.000042583 | SRSF3   | 19.329 | 43.231 | 22.6 |
| Q6ZQR2 | 0.47  | Down | 5.60E-07    | CFAP77  | 36.499 | 64.552 | 34.1 |
| Q9BYC5 | 0.468 | Down | 0.000037664 | FUT8    | 66.515 | 18.256 | 14.6 |
| Q8IXY8 | 0.466 | Down | 0.000021184 | PPIL6   | 35.228 | 4.6016 | 12.5 |
| P02787 | 0.465 | Down | 1.91E-05    | TF      | 77.063 | 259.69 | 37.7 |
| Q86UX7 | 0.465 | Down | 0.0030562   | FERMT3  | 75.952 | 44.562 | 10.9 |
| Q5VTH2 | 0.465 | Down | 0.000198809 | CFAP126 | 19.293 | 9.7296 | 16.9 |
| P16070 | 0.463 | Down | 1.88E-06    | CD44    | 81.537 | 5.237  | 3.4  |
| P01023 | 0.456 | Down | 0.043139    | A2M     | 163.29 | 175.37 | 6.6  |
| P04217 | 0.45  | Down | 4.25E-06    | A1BG    | 54.253 | 1.5997 | 1.6  |



|        |       |      |             |          |        |        |      |
|--------|-------|------|-------------|----------|--------|--------|------|
| Q9P2T0 | 0.449 | Down | 4.06E-06    | THEG     | 43.443 | 15.191 | 19.8 |
| P52566 | 0.449 | Down | 3.82E-06    | ARHGDIB  | 22.988 | 11.701 | 13.4 |
| O00160 | 0.446 | Down | 1.69E-05    | MYO1F    | 124.84 | 19.852 | 9.3  |
| P0C7N4 | 0.446 | Down | 0.000058603 | TMEM191B | 39.064 | 33.576 | 19.1 |
| Q92522 | 0.446 | Down | 0.000115093 | H1FX     | 22.487 | 11.12  | 16.4 |
| P27918 | 0.446 | Down | 0.00046033  | CFP      | 51.276 | 3.6193 | 4.7  |
| Q6UWM5 | 0.443 | Down | 9.69E-07    | GLIPR1L1 | 27.151 | 93.085 | 30.2 |
| Q13185 | 0.442 | Down | 0.000020133 | CBX3     | 20.811 | 9.5526 | 13.7 |
| Q96SF2 | 0.44  | Down | 0.000022022 | CCT8L2   | 59.387 | 6.9858 | 7.9  |
| P43353 | 0.439 | Down | 0.000021085 | ALDH3B1  | 51.839 | 8.7336 | 7.3  |
| P07305 | 0.434 | Down | 0.000037602 | H1F0     | 20.863 | 12.805 | 27.3 |
| P38159 | 0.434 | Down | 0.0102208   | RBMX     | 42.331 | 2.0908 | 7.4  |
| P19338 | 0.433 | Down | 4.68E-06    | NCL      | 76.613 | 82.809 | 15.2 |
| O75380 | 0.432 | Down | 0.00025713  | NDUFS6   | 13.711 | 24.981 | 33.9 |
| Q03252 | 0.43  | Down | 0.000039666 | LMNB2    | 69.948 | 4.5826 | 9.8  |
| Q8NG31 | 0.43  | Down | 0.00057976  | KNL1     | 265.39 | 2.1482 | 0.4  |
| Q9HAQ2 | 0.429 | Down | 0.000039168 | KIF9     | 89.985 | 45.79  | 11   |
| Q6UXK2 | 0.429 | Down | 0.000122842 | ISLR2    | 78.989 | 2.0983 | 1.9  |
| A5D8V7 | 0.425 | Down | 0.000077681 | CCDC151  | 69.139 | 68.224 | 26.4 |
| P13498 | 0.425 | Down | 1.97E-06    | CYBA     | 21.012 | 6.824  | 20   |
| Q9H1E3 | 0.424 | Down | 0.000143707 | NUCKS1   | 27.296 | 1.7651 | 3.7  |
| P14555 | 0.421 | Down | 1.90E-05    | PLA2G2A  | 16.083 | 135.65 | 45.8 |
| Q5SSJ5 | 0.421 | Down | 0.000038469 | HP1BP3   | 61.206 | 22.585 | 10.7 |
| P30273 | 0.419 | Down | 0.000042264 | FCER1G   | 9.6674 | 8.9489 | 26.7 |
| Q9P241 | 0.419 | Down | 0.000139647 | ATP10D   | 160.27 | 1.6878 | 0.6  |
| Q96A26 | 0.418 | Down | 0.000041871 | FAM162A  | 17.342 | 1.7395 | 5.2  |
| Q96LQ0 | 0.416 | Down | 0.00112233  | PPP1R36  | 49.44  | 3.93   | 5    |
| Q6ZTR5 | 0.415 | Down | 0.000124013 | CFAP47   | 361.62 | 23.04  | 2.1  |
| Q15080 | 0.408 | Down | 0.0100567   | NCF4     | 39.031 | 9.9419 | 12.1 |
| P49959 | 0.405 | Down | 0.000084293 | MRE11    | 80.592 | 8.3318 | 4.8  |
| Q8N6G2 | 0.402 | Down | 0.00054119  | TEX26    | 33.595 | 7.3639 | 7.3  |
| Q01130 | 0.402 | Down | 0.000157835 | SRSF2    | 25.476 | 2.0078 | 3.6  |
| Q15413 | 0.401 | Down | 0.00034376  | RYR3     | 552.04 | 2.3867 | 0.3  |
| P27105 | 0.4   | Down | 0.00140446  | STOM     | 31.73  | 86.291 | 31.6 |
| Q2M243 | 0.399 | Down | 0.000024045 | CCDC27   | 75.354 | 73.32  | 13.3 |
| P20700 | 0.398 | Down | 0.00075519  | LMNB1    | 66.408 | 126.02 | 31.7 |
| Q5TZF3 | 0.395 | Down | 0.000080787 | ANKRD45  | 31.809 | 4.7072 | 4.6  |
| Q96M63 | 0.393 | Down | 0.000001948 | CCDC114  | 75.045 | 44.229 | 15.2 |
| O75602 | 0.391 | Down | 0.00001849  | SPAG6    | 55.476 | 62.062 | 17.3 |
| O00423 | 0.39  | Down | 3.92E-07    | EML1     | 89.86  | 5.9456 | 1.7  |
| Q9UBX7 | 0.389 | Down | 0.000057121 | KLK11    | 31.059 | 73.677 | 17   |
| Q9UHI8 | 0.382 | Down | 1.33E-07    | ADAMTS1  | 105.36 | 126.05 | 9.6  |
| P49221 | 0.381 | Down | 9.78E-07    | TGM4     | 77.144 | 323.31 | 37.6 |
| P52790 | 0.38  | Down | 0.000063379 | HK3      | 99.024 | 16.61  | 8    |
| P08670 | 0.379 | Down | 1.58E-06    | VIM      | 53.651 | 323.31 | 53.4 |
| P22087 | 0.379 | Down | 0.000022028 | FBL      | 33.784 | 8.8734 | 5.9  |
| Q96M29 | 0.376 | Down | 1.99E-08    | TEKT5    | 56.294 | 323.31 | 56.1 |

|         |       |      |             |           |        |        |      |
|---------|-------|------|-------------|-----------|--------|--------|------|
| Q5W041  | 0.376 | Down | 1.68E-06    | ARMC3     | 96.404 | 23.408 | 10.4 |
| O00193  | 0.376 | Down | 0.000182318 | SMAP      | 20.332 | 1.6768 | 3.8  |
| P19878  | 0.375 | Down | 0.000084243 | NCF2      | 59.761 | 16.785 | 8.9  |
| Q8IZS6  | 0.372 | Down | 0.000139786 | TCTE3     | 23.175 | 29.228 | 18.2 |
| P00738  | 0.371 | Down | 3.16E-06    | HP        | 45.205 | 52.373 | 25.1 |
| Q9Y6V0  | 0.369 | Down | 1.51E-05    | PCLO      | 560.69 | 2.407  | 0.3  |
| P28676  | 0.356 | Down | 1.91E-05    | GCA       | 24.01  | 69.374 | 33.6 |
| P18084  | 0.352 | Down | 3.00E-06    | ITGB5     | 88.053 | 2.3719 | 1.1  |
| P09769  | 0.348 | Down | 0.00029684  | FGR       | 59.478 | 4.1495 | 5.1  |
| P02671  | 0.344 | Down | 0.00138319  | FGA       | 94.972 | 3.3274 | 1.4  |
| P24158  | 0.343 | Down | 0.000057317 | PRTN3     | 27.807 | -2     | 6.6  |
| A4D1T9  | 0.342 | Down | 0.00025978  | PRSS37    | 26.444 | 56.746 | 24.3 |
| Q4G0P3  | 0.338 | Down | 1.77E-05    | HYDIN     | 575.89 | 26.468 | 2.6  |
| Q71DI3  | 0.334 | Down | 0.000021807 | HIST2H3A  | 15.388 | 1.7651 | 36   |
| P31146  | 0.333 | Down | 1.55E-05    | CORO1A    | 51.026 | 80.971 | 14.8 |
| P09917  | 0.333 | Down | 0.00054112  | ALOX5     | 77.982 | 33.73  | 6.2  |
| Q8TE04  | 0.325 | Down | 4.38E-06    | PANK1     | 64.339 | -2     | 4    |
| Q9NS25  | 0.323 | Down | 1.08E-06    | SPANXB1   | 11.84  | 323.31 | 86.4 |
| Q8NBQ5  | 0.322 | Down | 1.04E-06    | HSD17B11  | 32.935 | 22.671 | 18   |
| P22894  | 0.314 | Down | 0.00180227  | MMP8      | 53.411 | 30.159 | 10.1 |
| Q9UBG3  | 0.311 | Down | 2.54E-06    | CRNN      | 53.533 | 43.351 | 10.7 |
| P00734  | 0.311 | Down | 7.27E-07    | F2        | 70.036 | 26.029 | 3.2  |
| P48960  | 0.31  | Down | 0.00120484  | CD97      | 91.868 | 13.6   | 5.5  |
| Q5T0W9  | 0.31  | Down | 1.37E-06    | FAM83B    | 114.8  | 1.6203 | 0.9  |
| Q16099  | 0.308 | Down | 0.00059844  | GRIK4     | 107.24 | -2     | 1.5  |
| P06703  | 0.306 | Down | 1.80E-05    | S100A6    | 10.18  | 3.3456 | 24.4 |
| O15226  | 0.305 | Down | 8.70E-07    | NKRF      | 77.672 | 1.8774 | 1.3  |
| P25815  | 0.304 | Down | 0.000100158 | S100P     | 10.4   | 13.782 | 24.2 |
| O95139  | 0.302 | Down | 0.000115342 | NDUFB6    | 15.489 | 32.941 | 19.5 |
| O75367  | 0.299 | Down | 0.00039641  | H2AFY     | 39.617 | 49.377 | 11.6 |
| P19174  | 0.299 | Down | 0.0056442   | PLCG1     | 148.53 | -2     | 0.6  |
| Q9C093  | 0.298 | Down | 1.95E-06    | SPEF2     | 209.81 | 17.879 | 5    |
| P14598  | 0.297 | Down | 0.000083378 | NCF1      | 44.651 | 18.284 | 10.8 |
| P20292  | 0.295 | Down | 1.72E-05    | ALOX5AP   | 18.157 | 1.7483 | 5.6  |
| Q9P2G3  | 0.29  | Down | 0.028841    | KLHL14    | 70.713 | 3.1633 | 3.3  |
| Q14956  | 0.29  | Down | 3.38E-08    | GNPMB     | 63.922 | 2.5836 | 1.6  |
| P08575  | 0.289 | Down | 0.000021311 | PTPRC     | 147.48 | 49.196 | 10.9 |
| Q9HD89  | 0.289 | Down | 1.64E-05    | RETN      | 11.419 | 100.97 | 59.3 |
| P05771  | 0.289 | Down | 0.000082584 | PRKCB     | 76.868 | 3.3611 | 4    |
| P21730  | 0.289 | Down | 2.09E-06    | C5AR1     | 39.335 | 2.5938 | 2.9  |
| P04839  | 0.287 | Down | 0.00004306  | CYBB      | 65.335 | 35.155 | 10.9 |
| P53999  | 0.28  | Down | 3.55E-07    | SUB1      | 14.395 | 11.51  | 17.3 |
| O95466  | 0.28  | Down | 0.000062851 | FMNL1     | 121.85 | 1.9657 | 1    |
| Q8NCH0  | 0.277 | Down | 1.79E-06    | CHST14    | 42.996 | 10.855 | 7.4  |
| Q96QU1  | 0.275 | Down | 0.000038575 | PCDH15    | 216.07 | -2     | 0.7  |
| Q5SSQS8 | 0.273 | Down | 0.00186349  | C10orf120 | 39.268 | 4.6163 | 8.1  |
| P32942  | 0.273 | Down | 0.000175685 | ICAM3     | 59.54  | 2.669  | 1.5  |

|        |       |      |             |          |        |        |      |
|--------|-------|------|-------------|----------|--------|--------|------|
| Q9H329 | 0.269 | Down | 2.05E-07    | EPB41L4B | 99.711 | -2     | 0.8  |
| Q10588 | 0.265 | Down | 0.00043954  | BST1     | 35.724 | 12.656 | 12.9 |
| A5D8W1 | 0.264 | Down | 0.031655    | CFAP69   | 105.88 | 76.908 | 8    |
| P14780 | 0.256 | Down | 1.89E-05    | MMP9     | 78.457 | 123.02 | 25.6 |
| P08246 | 0.251 | Down | 9.33E-07    | ELANE    | 28.518 | 9.5136 | 9.7  |
| P41218 | 0.249 | Down | 1.68E-05    | MNDA     | 45.836 | 112.85 | 22.9 |
| A1A4V9 | 0.248 | Down | 0.000123625 | CCDC189  | 37.921 | 24.65  | 8.2  |
| P05107 | 0.247 | Down | 0.0037627   | ITGB2    | 84.781 | 139.04 | 27.7 |
| P17213 | 0.247 | Down | 0.00093606  | BPI      | 53.899 | 77.083 | 16.4 |
| P11215 | 0.241 | Down | 2.92E-06    | ITGAM    | 127.18 | 258.13 | 24.9 |
| P10176 | 0.241 | Down | 0.00051533  | COX8A    | 7.579  | 1.7355 | 13   |
| Q496Y0 | 0.241 | Down | 5.51E-07    | LONRF3   | 84.489 | -2     | 0.9  |
| P05164 | 0.236 | Down | 4.40E-08    | MPO      | 83.868 | 265.85 | 36.9 |
| P30711 | 0.231 | Down | 0.000022987 | GSTT1    | 27.335 | 5.7329 | 9.2  |
| P61626 | 0.23  | Down | 0.000001316 | LYZ      | 16.537 | 25.657 | 49.3 |
| P12724 | 0.229 | Down | 0.006015    | RNASE3   | 18.385 | 57.176 | 21.9 |
| P04003 | 0.228 | Down | 0.0054445   | C4BPA    | 67.033 | 9.4953 | 2.3  |
| P26022 | 0.226 | Down | 0.000042966 | PTX3     | 41.975 | 3.0188 | 2.6  |
| Q32M84 | 0.219 | Down | 3.76E-07    | BTBD16   | 58.48  | 4.3379 | 5.9  |
| Q9Y5U8 | 0.214 | Down | 2.09E-07    | MPC1     | 12.347 | 2.6723 | 15.6 |
| P08311 | 0.212 | Down | 1.63E-06    | CTSG     | 28.837 | 126.62 | 42   |
| P80188 | 0.198 | Down | 0.0002563   | LCN2     | 22.588 | 86.84  | 45.5 |
| P16401 | 0.186 | Down | 9.34E-07    | HIST1H1B | 22.58  | 37.74  | 27.4 |
| O95498 | 0.181 | Down | 3.83E-06    | VNN2     | 58.502 | 10.032 | 4.2  |
| Q9Y4K1 | 0.178 | Down | 1.71E-05    | CRYBG1   | 188.67 | 6.9781 | 2.8  |
| Q502W6 | 0.169 | Down | 0.000155345 | VWA3B    | 145.75 | 3.6818 | 1.6  |
| Q9NW08 | 0.167 | Down | 9.77E-07    | POLR3B   | 127.78 | 1.792  | 0.7  |
| P08631 | 0.156 | Down | 6.57E-07    | HCK      | 59.599 | 6.4977 | 8.9  |
| Q9NRL3 | 0.146 | Down | 0.0061026   | STRN4    | 80.595 | 13.243 | 3.2  |
| O75015 | 0.144 | Down | 0.000041324 | FCGR3B   | 26.216 | 5.6043 | 5.2  |
| P06702 | 0.139 | Down | 0.00115966  | S100A9   | 13.242 | 271.67 | 74.6 |
| P05109 | 0.132 | Down | 6.65E-07    | S100A8   | 10.834 | 140.43 | 63.4 |
| Q9UPZ3 | 0.13  | Down | 3.84E-06    | HPS5     | 127.45 | -2     | 0.8  |
| Q9C035 | 0.123 | Down | 0.000064098 | TRIM5    | 56.338 | 7.8562 | 7.3  |
| Q9H195 | 0.119 | Down | 2.90E-06    | MUC3B    | 131.4  | 1.8776 | 2.6  |
| P09497 | 0.097 | Down | 0.000042214 | CLTB     | 25.19  | 3.3309 | 10   |
| Q29983 | 0.095 | Down | 0.00106291  | MICA     | 42.915 | -2     | 1.8  |
| Q6ZS02 | 0.094 | Down | 0.000041665 | DNM1P46  | 23.739 | -2     | 4.5  |
| O15018 | 0.069 | Down | 2.46E-07    | PDZD2    | 301.64 | 2.324  | 0.4  |
| Q86Y34 | 0.062 | Down | 0.000004049 | ADGRG3   | 60.86  | 6.8931 | 2.6  |
| P80511 | 0.06  | Down | 1.98E-07    | S100A12  | 10.575 | 18.416 | 31.5 |
| Q96A54 | 0.059 | Down | 0.000044662 | ADIPOR1  | 42.615 | -2     | 3.2  |
| Q8WWQ0 | 0.039 | Down | 1.19E-07    | PHIP     | 206.69 | 2.9061 | 0.8  |
| Q01740 | 0.038 | Down | 7.17E-07    | FMO1     | 60.31  | 1.6055 | 2.1  |
